# Supplementary material for: Synthesis of N-alkyl isatins via oxidative cyclization of N-alkyl 2-bromo(chloro)acetanilides
Source: Royal Society of Chemistry journal article supplement (doi:10.1039/c4ob00118d), 2014-01-01

## Supporting Information

### Synthesis of *N*-alkyl isatins via oxidative cyclization of *N*-alkyl 2-bromo(chloro)acetanilides

Qingwen Gui,<sup>a</sup> Fenglin Dai,<sup>a</sup> Jidan Liu,<sup>a</sup> Peixing Chen,<sup>a</sup> Zhiyong Yang,<sup>a</sup> Xiang Chen,<sup>a</sup>  
Ze Tan,<sup>\*a</sup>

<sup>a</sup>State Key Laboratory of Chemo/Biosensing and Chemometrics, College of Chemistry and Chemical Engineering,  
Hunan University, Changsha 410082, P. R. China.

E-mail: ztanze@gmail.com

### Table of Contents

|                                                  |           |
|--------------------------------------------------|-----------|
| I General Consideration                          | S 2       |
| II Experimental section                          | S 2       |
| III Characterization Data for Selected Compounds | S 2- S 28 |

## General information

All the solvents and commercially available reagents were purchased from commercial sources and used directly.  $^1\text{H}$  NMR and  $^{13}\text{C}$  NMR were recorded in  $\text{CDCl}_3$  at room temperature on the Varian INOVA-400 spectrometer (400 MHz  $^1\text{H}$ ). The chemical-shifts scale is based on internal TMS. The coupling constants,  $J$ , are reported in Hertz (Hz). Products were purified by flash column chromatography on 200-300 mesh silica gel,  $\text{SiO}_2$ . ICP-MS data were obtained using a Perkin Elmer OPTIMA5300 DV. High-resolution mass spectra (HRMS) were performed using electron impact ionization.

## Experimental section

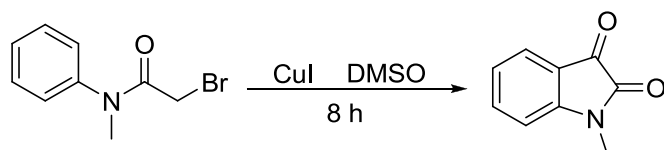

To a stirred solution of 3.0 ml of anhydrous DMSO was added CuI (0.025 mmol) and *N*-methyl-2-bromoacetanilide (0.5 mmol) at room temperature. The system was heated at 100°C for 8 hours (open to air with a drying tube). After cooling to room temperature, the reaction mixture was diluted with diethyl ether (25 mL) and water (25 mL). The aqueous layer was extracted with diethyl ether (3x25 mL) and washed with brine. The organic layers were combined, dried with  $\text{MgSO}_4$ , filtered, and the solvent was removed under reduced pressure. The residue was purified by flash column chromatography on silica gel (petroleum ether/ethyl acetate) to afford 68.5 mg of the desired product in 83% yield.

## Analytical data of isatins

### *N*-Methylindoline-2,3-dione (2a)<sup>1</sup>

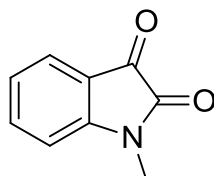

TLC (petroleum ether/ ethyl acetate, 2/1); Yield: 83% (Br)/ 78% (Cl);

red solid; m.p.: 121.7-124.5 °C;

IR(KBr)/ $\text{cm}^{-1}$ : 2930, 1749, 1615, 1486, 1253, 752;

$^1\text{H}$  NMR (400MHz,  $\text{CDCl}_3$ ):  $\delta$  7.62 (m, 2 H), 7.14 (t,  $J = 7.9$  Hz, 1 H), 6.90 (d,  $J = 7.7$  Hz, 1 H), 3.26 (s, 3 H).

$^{13}\text{C}$  NMR (100MHz,  $\text{CDCl}_3$ ):  $\delta$  183.32, 158.21, 151.43, 138.38, 125.26, 123.81, 117.41, 109.89, 26.20.

MS (m/z) 161 ( $\text{M}^+$ ).

### *N*-Ethylindoline-2,3-dione (2b)<sup>2</sup>

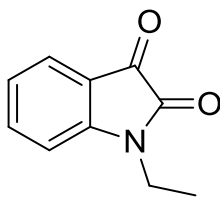

TLC (petroleum ether/ ethyl acetate, 2/1); Yield: 80% (Br)/74% (Cl);

red solid; m.p.: 122.5-124.8 °C;

IR(KBr)/cm<sup>-1</sup>: 2932, 1731, 1609, 1408, 1349, 752;

<sup>1</sup>H NMR (400MHz, CDCl<sub>3</sub>): δ 7.53 (m, 2 H), 7.05 (t, *J* = 7.5 Hz, 1 H), 6.85 (d, *J* = 8.2 Hz, 1 H), 3.72 (q, *J* = 7.2 Hz, 2 H), 1.25 (t, *J* = 7.2 Hz, 3 H);

<sup>13</sup>C NMR (100MHz, CDCl<sub>3</sub>): δ 183.66, 157.79, 150.57, 138.33, 125.41, 123.58, 117.49, 109.99, 34.87, 12.45;

MS (m/z) 175 (M<sup>+</sup>).

### *N*-Benzylindoline-2,3-dione (2c)<sup>1</sup>

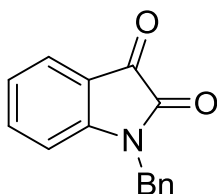

TLC (petroleum ether/ ethyl acetate, 2/1); Yield: 84% (Br)/77% (Cl);

red solid; m.p.: 127.8-129.2 °C;

IR(KBr)/cm<sup>-1</sup>: 2932, 1731, 1611, 1449, 1332, 758;

<sup>1</sup>H NMR (400MHz, CDCl<sub>3</sub>): δ 7.61 (d, *J* = 7.4 Hz, 1 H), 7.48 (d, *J* = 7.8 Hz, 1 H), 7.39 – 7.28 (m, 5H), 7.09 (t, *J* = 7.5 Hz, 1H), 6.78 (d, *J* = 8.0 Hz, 1H), 4.94 (s, 2 H);

<sup>13</sup>C NMR (100MHz, CDCl<sub>3</sub>): δ 183.21, 158.23, 150.68, 138.29, 134.45, 129.02, 128.13, 127.39, 125.39, 123.84, 117.63, 110.97, 44.01;

MS (m/z) 237 (M<sup>+</sup>).

### *N*-Butylindoline-2,3-dione(2d)<sup>3</sup>

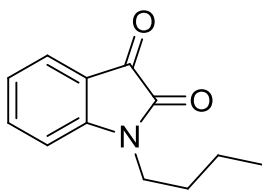

TLC (petroleum ether/ ethyl acetate, 2/1); Yield: 79%;

red solid; m.p.: 155.8-158.7 °C;

IR(KBr)/cm<sup>-1</sup>: 2960, 1733, 1602, 1579, 1352, 767;

<sup>1</sup>H NMR (400MHz, CDCl<sub>3</sub>): δ 7.52 (m, 2 H), 7.04 (t, *J* = 7.5 Hz, 1 H), 6.84 (m, 1 H), 3.65 (t, *J* = 7.3 Hz, 2 H), 1.61 (quint, *J* = 8.0 Hz, 2 H), 1.34 (sext, *J* = 8.0 Hz, 2 H), 0.90 (t, *J* = 7.3 Hz, 3 H);

<sup>13</sup>C NMR (100MHz, CDCl<sub>3</sub>): δ 183.62, 158.06, 150.99, 138.28, 125.34, 123.53, 117.48, 110.13, 39.93, 29.20, 20.06, 13.61;

MS (m/z) 203 (M<sup>+</sup>).

***N*-Isopropylindoline-2,3-dione(2e)**<sup>3</sup>

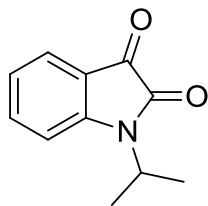

TLC (petroleum ether/ ethyl acetate, 2/1); Yield: 77% (Br)/75% (Cl);

red solid; m.p.: 124.4-125.7 °C;

IR(KBr)/cm<sup>-1</sup>: 2978, 1732, 1609, 1468, 1349, 752;

<sup>1</sup>H NMR (400MHz, CDCl<sub>3</sub>): δ 7.60 (m, 1H), 7.56 (d, *J* = 7.8 Hz, 1 H), 7.10 (t, *J* = 7.5 Hz, 1 H), 7.04 (d, *J* = 8.0 Hz, 1 H), 4.54 (m, 1 H), 1.53 (d, *J* = 7.0 Hz, 6 H);

<sup>13</sup>C NMR (100MHz, CDCl<sub>3</sub>): δ 183.80, 157.80, 150.47, 138.08, 125.54, 123.22, 117.85, 111.29, 44.71, 19.31;

MS (m/z) 189 (M<sup>+</sup>).

**5-Methyl-*N*-methylindoline-2,3-dione (2f)**<sup>1</sup>

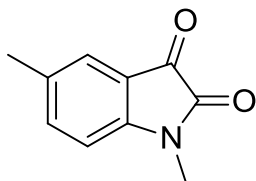

TLC (petroleum ether/ ethyl acetate, 2/1); Yield: 81% (Br)/77% (Cl);

red solid; m.p.: 150.1-151.6 °C;

IR(KBr)/cm<sup>-1</sup>: 2973, 1755, 1625, 1595, 1448, 776;

<sup>1</sup>H NMR (400MHz, CDCl<sub>3</sub>): δ 7.41 (m, 2 H), 6.79 (d, *J* = 8.5 Hz, 1 H), 3.23 (s, 3 H), 2.34 (s, 3 H);

<sup>13</sup>C NMR (100MHz, CDCl<sub>3</sub>): δ 183.59, 158.31, 149.24, 138.72, 133.62, 125.58, 117.40, 109.69, 26.17, 20.64;

MS (m/z) 175 (M<sup>+</sup>).

**5-Chloro-*N*-methylindoline-2,3-dione (2g)**<sup>1</sup>

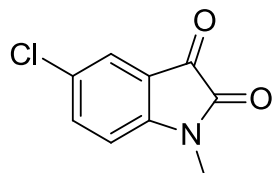

TLC (petroleum ether/ ethyl acetate, 2/1); Yield: 72%;

red solid; m.p.: 165.1-166.9 °C;

IR (KBr)/cm<sup>-1</sup>: 2998, 1745, 1605, 1502, 1332, 722;

<sup>1</sup>H NMR (400MHz, CDCl<sub>3</sub>): δ 7.58 (m, 2H), 6.88 (d, *J* = 8.2 Hz, 1H), 3.26 (s, 3H);

<sup>13</sup>C NMR (100MHz, CDCl<sub>3</sub>): δ 182.29, 157.63, 149.65, 137.72, 129.63, 125.18, 118.18, 91.18, 26.34;

MS (m/z) 195 (M<sup>+</sup>).

**5-Fluoro-N-methylindoline-2,3-dione (2h)**<sup>1</sup>

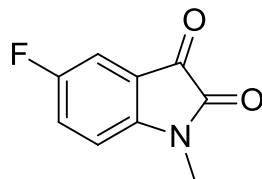

TLC (petroleum ether/ ethyl acetate, 2/1); Yield: 68%;

red solid; m.p.: 150.8-152.6 °C;

IR(KBr)/cm<sup>-1</sup>: 2978, 1745, 1623, 1500, 1368, 779;

<sup>1</sup>H NMR (400MHz, CDCl<sub>3</sub>): δ 7.33 (m, 2 H), 6.89 (d, *J* = 8.5 Hz, 1 H), 3.26 (s, 3 H);

<sup>13</sup>C NMR (100MHz, CDCl<sub>3</sub>): δ 182.74, 160.56, 158.02, 157.93, 147.47, 124.76, 124.51, 117.98, 117.91, 112.46, 112.21, 111.08, 111.01, 26.30;

MS (m/z) 179 (M<sup>+</sup>).

**5-Cyan-N-methylindoline-2,3-dione (2i)**

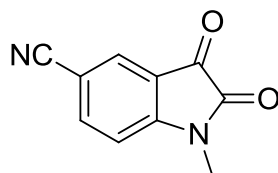

TLC (petroleum ether/ ethyl acetate, 2/1); Yield: 60%;

red solid; m.p.: 157.2-160.1 °C;

IR(KBr)/cm<sup>-1</sup>: 2959, 1734, 1619, 1468, 1349, 752 ;

<sup>1</sup>H NMR (400MHz, CDCl<sub>3</sub>): δ 7.92 (m, 2H), 7.05 (d, *J* = 8.2 Hz, 1H), 3.33 (s, 3H);

<sup>13</sup>C NMR (100MHz, CDCl<sub>3</sub>): δ 181.11, 157.45, 153.96, 141.97, 128.66, 117.45, 117.34, 110.80, 107.64, 26.62;

HRMS m/z calcd for C<sub>10</sub>H<sub>6</sub>N<sub>2</sub>O<sub>2</sub>: 186.0429, found: 186.0425.

**7-Chloro-N-methylindoline-2,3-dione (2j)**<sup>4</sup>

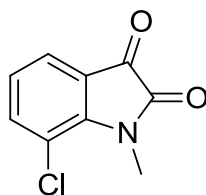

TLC (petroleum ether/ ethyl acetate, 2/1); Yield: 68%;

red solid; m.p.: 165.8-168.9 °C;

IR(KBr)/cm<sup>-1</sup>: 2989, 1746, 1610, 1489, 1352, 765;

<sup>1</sup>H NMR (400MHz, CDCl<sub>3</sub>): δ 7.47 (m, 2 H), 6.99 (d, *J* = 8.1 Hz, 1 H), 3.57 (s, 3 H);

<sup>13</sup>C NMR (100MHz, CDCl<sub>3</sub>): δ 182.66, 158.48, 146.78, 140.41, 134.14, 124.73, 123.94, 117.63, 29.69;

MS (m/z) 195 (M<sup>+</sup>).

**5-Methoxy-N-methylindoline-2,3-dione (2k)**<sup>1</sup>

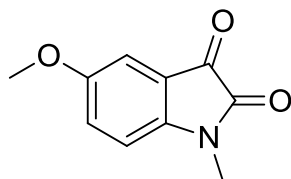

TLC (petroleum ether/ ethyl acetate, 2/1); Yield: 85%;

red solid; m.p.: 171.4-172.2 °C;

IR(KBr)/cm<sup>-1</sup>: 2956, 1750, 1620, 1488, 1329, 814;

<sup>1</sup>H NMR (400MHz, CDCl<sub>3</sub>): δ 7.15 (m, 2 H), 6.82 (d, *J* = 8.4 Hz, 1 H), 3.81 (s, 3 H), 3.22 (s, 3 H);

<sup>13</sup>C NMR (100MHz, CDCl<sub>3</sub>): δ 183.68, 158.23, 156.50, 145.26, 124.51, 117.74, 110.84, 109.53, 55.91, 26.16;

MS (m/z) 191 (M<sup>+</sup>).

**7-Methyl-N-ethylindoline-2,3-dione (2l)**

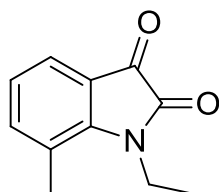

TLC (petroleum ether/ ethyl acetate, 2/1); Yield: 70%;

red solid; m.p.: 167.5-168.3 °C;

IR(KBr)/cm<sup>-1</sup>: 2973, 1727, 1653, 1595, 1449, 1355, 775;

<sup>1</sup>H NMR (400MHz, CDCl<sub>3</sub>): δ 7.47 (d, *J* = 7.3 Hz, 1 H), 7.35 (d, *J* = 7.7 Hz, 1 H), 7.01 (t, *J* = 7.5 Hz, 1 H), 4.01 (q, *J* = 8.0 Hz, 2 H), 2.54 (s, 3 H), 1.34 (t, *J* = 7.1 Hz, 3 H);

<sup>13</sup>C NMR (100MHz, CDCl<sub>3</sub>): δ 184.12, 159.11, 148.33, 142.36, 123.67, 123.50, 121.35, 118.77, 36.85, 18.71, 14.55;

HRMS m/z calcd for C<sub>11</sub>H<sub>11</sub>NO<sub>2</sub>: 189.0790, found: 189.0784.

**N-Ethyl-1H-benzo[g]indole-2,3-dione(2m)**

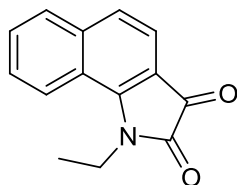

TLC (petroleum ether/ ethyl acetate, 2/1); Yield: 63%;

red solid; m.p.: 198.2-200.2 °C;

IR(KBr)/cm<sup>-1</sup>: 3055, 2978, 1744, 1628, 1592, 1575, 817, 758;

<sup>1</sup>H NMR (400MHz, CDCl<sub>3</sub>): δ 8.56 (d, *J* = 8.4 Hz, 1 H), 8.10 (d, *J* = 8.7 Hz, 1 H), 7.75 (d, *J* = 8.3 Hz, 1 H), 7.61 (t, *J* = 8.2 Hz, 1 H), 7.39 (t, *J* = 8.1 Hz, 1 H), 7.12 (d, *J* = 8.7 Hz, 1 H), 3.81 (q, *J* = 8.0 Hz, 2 H), 1.34 (t, *J* = 7.2 Hz, 3 H);

<sup>13</sup>C NMR (100MHz, CDCl<sub>3</sub>): δ 182.65, 158.48, 154.04, 140.48, 131.18, 129.95, 129.22, 128.88, 125.43, 123.14, 110.09, 108.97, 34.79, 13.04;

HRMS  $m/z$  calcd for  $C_{14}H_{11}NO_2$ : 225.0790, found: 225.0786.

**5,7-Dimethyl-*N*-*n*-butylindoline-2,3-dione (2n)**

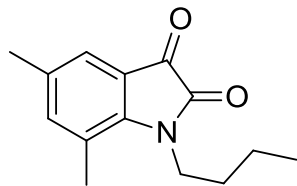

TLC (petroleum ether/ ethyl acetate, 2/1); Yield: 70%;

red solid; m.p.: 177.2-179.1 °C;

IR(KBr)/ $cm^{-1}$ : 2959, 2929, 2870, 1732, 1683, 1597, 1486, 722;

$^1H$  NMR (400MHz,  $CDCl_3$ ):  $\delta$  7.25 (s, 1 H), 7.15 (s, 1 H), 3.88 (t,  $J = 8.0$  Hz, 2 H), 2.47 (s, 3 H), 2.27 (s, 3 H), 1.66 (m, 2 H), 1.42 (m, 2 H), 0.97 (t,  $J = 7.3$  Hz, 3 H);

$^{13}C$  NMR (100MHz,  $CDCl_3$ ):  $\delta$  184.30, 159.30, 146.24, 142.82, 133.31, 123.70, 121.13, 118.85, 41.65, 31.28, 20.17, 19.82, 18.53, 13.64;

HRMS  $m/z$  calcd for  $C_{14}H_{17}NO_2$ : 231.1259, found: 231.1255.

**5-Methyl-*N*-butyl-indoline-2,3-dione (2o)<sup>3</sup>**

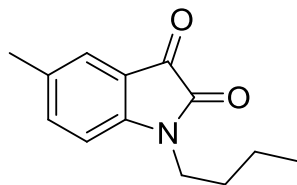

TLC (petroleum ether/ ethyl acetate, 2/1); Yield: 70%;

red solid; m.p.: 174.2-176.4 °C;

IR(KBr)/ $cm^{-1}$ : 2960, 2873, 1731, 1597, 1350, 767, 726;

$^1H$  NMR (400MHz,  $CDCl_3$ ):  $\delta$  7.38 (d,  $J = 7.3$  Hz, 1 H), 7.26 (d,  $J = 7.7$  Hz, 1 H), 6.93 (t,  $J = 7.5$  Hz, 1 H), 3.85 (t,  $J = 8.0$  Hz, 2 H), 2.44 (s, 3 H), 1.60 (quint,  $J = 8.0$  Hz, 2 H), 1.35 (sext,  $J = 8.0$  Hz, 2 H), 0.90 (t,  $J = 7.4$  Hz, 3 H);

$^{13}C$  NMR (100MHz,  $CDCl_3$ ):  $\delta$  184.10, 159.22, 148.51, 142.40, 123.65, 123.47, 121.40, 118.76, 41.75, 31.40, 19.84, 18.75, 13.68;

MS ( $m/z$ ) 217 ( $M^+$ ).

**5-Methyl-*N*-(*sec*-butyl)-indoline-2,3-dione(2p)**

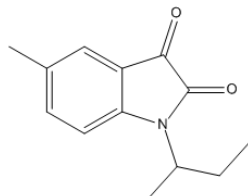

TLC (petroleum ether/ ethyl acetate, 2/1); Yield: 73%;

red solid; m.p.: 189.4-190.1 °C;

IR(KBr)/ $cm^{-1}$ : 2966, 2935, 2876, 1731, 1621, 1488, 1329, 813;

$^1H$  NMR (400MHz,  $CDCl_3$ ):  $\delta$  7.40 (m, 2 H), 6.96 (d,  $J = 8.0$  Hz, 1 H), 4.32 (m, 1 H), 2.33 (s, 3 H), 2.03 (m, 1 H), 1.82 (m, 1 H), 1.49 (d,  $J = 8.0$  Hz, 3 H), 0.93 (t,  $J = 7.4$  Hz, 3 H);

$^{13}\text{C}$  NMR (100MHz,  $\text{CDCl}_3$ ):  $\delta$  183.87, 158.01, 148.27, 138.48, 132.86, 125.57, 117.59, 111.21, 50.47, 26.10, 20.29, 17.35, 11.02;  
HRMS  $m/z$  calcd for  $\text{C}_{13}\text{H}_{15}\text{NO}_3$ : 233.1052, found: 233.1050.

#### 6-Methyl-N-ethylindoline-2,3-dione (2q)

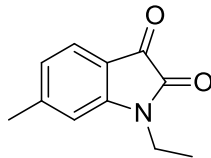

TLC (petroleum ether/ ethyl acetate, 2/1);

red solid; m.p.: 137.8-139.1 °C;

IR(KBr)/ $\text{cm}^{-1}$ : 2933, 1736, 1721, 1615, 1356, 755;

$^1\text{H}$  NMR (400MHz,  $\text{CDCl}_3$ ):  $\delta$  7.49 (d,  $J = 7.6$  Hz, 1 H), 6.91 (d,  $J = 7.6$  Hz, 1 H), 6.71 (s, 1 H), 3.77 (q,  $J = 8.0$  Hz, 2 H), 2.45 (s, 3 H), 1.31 (t,  $J = 7.2$  Hz, 3 H);

$^{13}\text{C}$  NMR (100MHz,  $\text{CDCl}_3$ ):  $\delta$  184.18, 157.78, 150.67, 141.36, 137.41, 125.92, 115.76, 107.21, 34.81, 18.07, 12.58;

HRMS  $m/z$  calcd for  $\text{C}_{14}\text{H}_{11}\text{NO}_2$ : 189.0790, found: 189.0788.

#### 4-Methyl-N-ethylindoline-2,3-dione (2q')

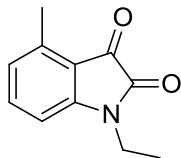

TLC (petroleum ether/ ethyl acetate, 2/1);

red solid; m.p.: 137.8-139.1 °C;

IR(KBr)/ $\text{cm}^{-1}$ : 2920, 1742, 1718, 1610, 1355, 738;

$^1\text{H}$  NMR (400MHz,  $\text{CDCl}_3$ ):  $\delta$  7.43 (t,  $J = 7.8$  Hz, 1 H), 6.88 (d,  $J = 7.8$  Hz, 1 H), 6.71 (d,  $J = 7.8$  Hz, 1 H), 3.77 (q,  $J = 8.0$  Hz, 2 H), 2.57 (s, 3 H), 1.30 (t,  $J = 7.2$  Hz, 3 H).

$^{13}\text{C}$  NMR (100MHz,  $\text{CDCl}_3$ ):  $\delta$  182.96, 158.50, 151.04, 150.61, 125.50, 124.26, 115.47, 110.71, 34.82, 22.59, 12.59;

HRMS  $m/z$  calcd for  $\text{C}_{14}\text{H}_{11}\text{NO}_2$ : 189.0790, found: 189.0784.

#### 5,7-Dimethyl-N-(sec-butyl)indoline-2,3-dione(2r)

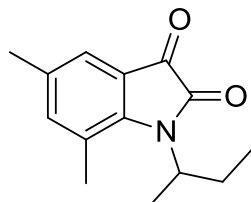

TLC (petroleum ether/ ethyl acetate, 2/1); Yield: 68%;

red solid; m.p.: 174.2-176.2 °C;

IR(KBr)/ $\text{cm}^{-1}$ : 2967, 2875, 1729, 1620, 1592, 1487, 779;

$^1\text{H}$  NMR (400MHz,  $\text{CDCl}_3$ ):  $\delta$  7.27 (s, 1 H), 7.12 (s, 1 H), 4.27 (m, 1 H), 2.47 (s, 3 H), 2.26 (s, 3 H), 1.85 (m, 2 H), 1.55 (d,  $J = 8.0$  Hz, 3 H), 0.94 (t,  $J = 7.4$  Hz, 3 H);



$^{13}\text{C}$  NMR (100MHz,  $\text{CDCl}_3$ ):  $\delta$  184.66, 159.60, 148.01, 143.36, 133.08, 124.01, 120.95, 119.25, 54.32, 26.46, 20.57, 20.14, 18.10, 11.52;  
HRMS  $m/z$  calcd for  $\text{C}_{14}\text{H}_{17}\text{NO}_2$ : 231.1259, found: 231.1256.

### Result of ICP-MS analysis of DMSO solvent

| 1  | sample | element | concentration | unit |
|----|--------|---------|---------------|------|
| 2  | DMSO   | Al      | 0.301         | mg/L |
| 3  | DMSO   | B       | 0.046         | mg/L |
| 4  | DMSO   | Ca      | 1.008         | mg/L |
| 5  | DMSO   | Cd      | 0.041         | mg/L |
| 6  | DMSO   | Co      | 0.03          | mg/L |
| 7  | DMSO   | Cu      | 0.088         | mg/L |
| 8  | DMSO   | K       | 0.21          | mg/L |
| 9  | DMSO   | Li      | 0.212         | mg/L |
| 10 | DMSO   | Mg      | 0.072         | mg/L |
| 11 | DMSO   | Na      | 0.723         | mg/L |

### References

- (1) B. X. Tang, R. J. Song, C. Y. Wu, Y. Liu, M. B. Zhou, W. T. Wei, G. B. Deng, D. L. Yin and J. H. Li, *J. Am. Chem. Soc.* 2010, **132**, 8900.
- (2) M. S. Shmidt, I. A. Perillo, M. Gonzalez and M. M. Blanco, *Tetrahedron lett.* 2012, **53**, 2514.
- (3) T. Liu, H. J. Yang, Y. Y. Jiang and H. Fu, *Adv. Synth. Catal.* 2013, **355**, 1169
- (4) Y. Ferandin, K. Bettayeb, M. Kritsanida, O. Lozach, P. Polychronopoulos, P. Magiatis, A. L. Skaltsounis and L. Meijer, *J. Med. Chem.*, 2006, **49**, 4638

20130509-tz-gqw-104  
gqw-104

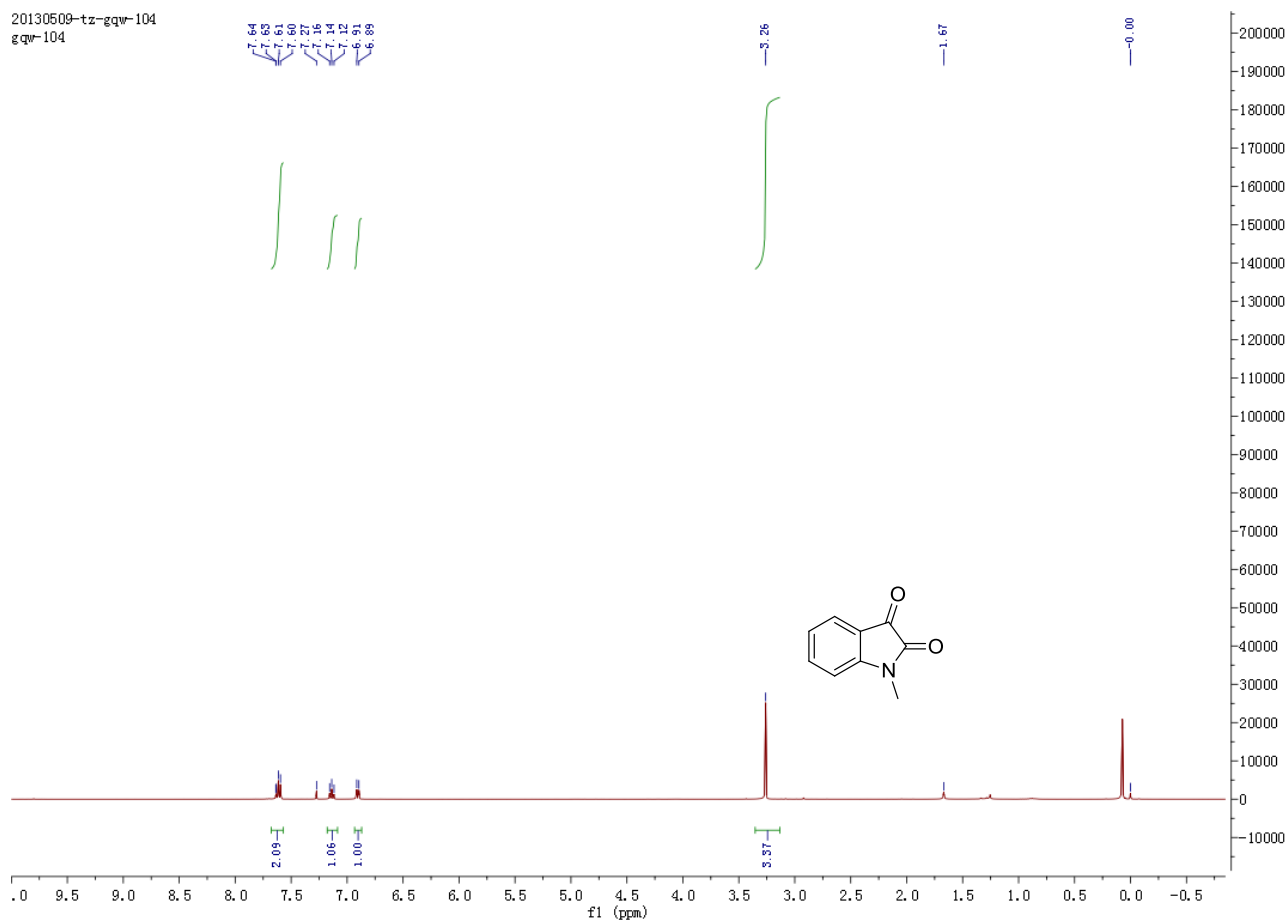

20130508-tz-gqw-104  
gqw104

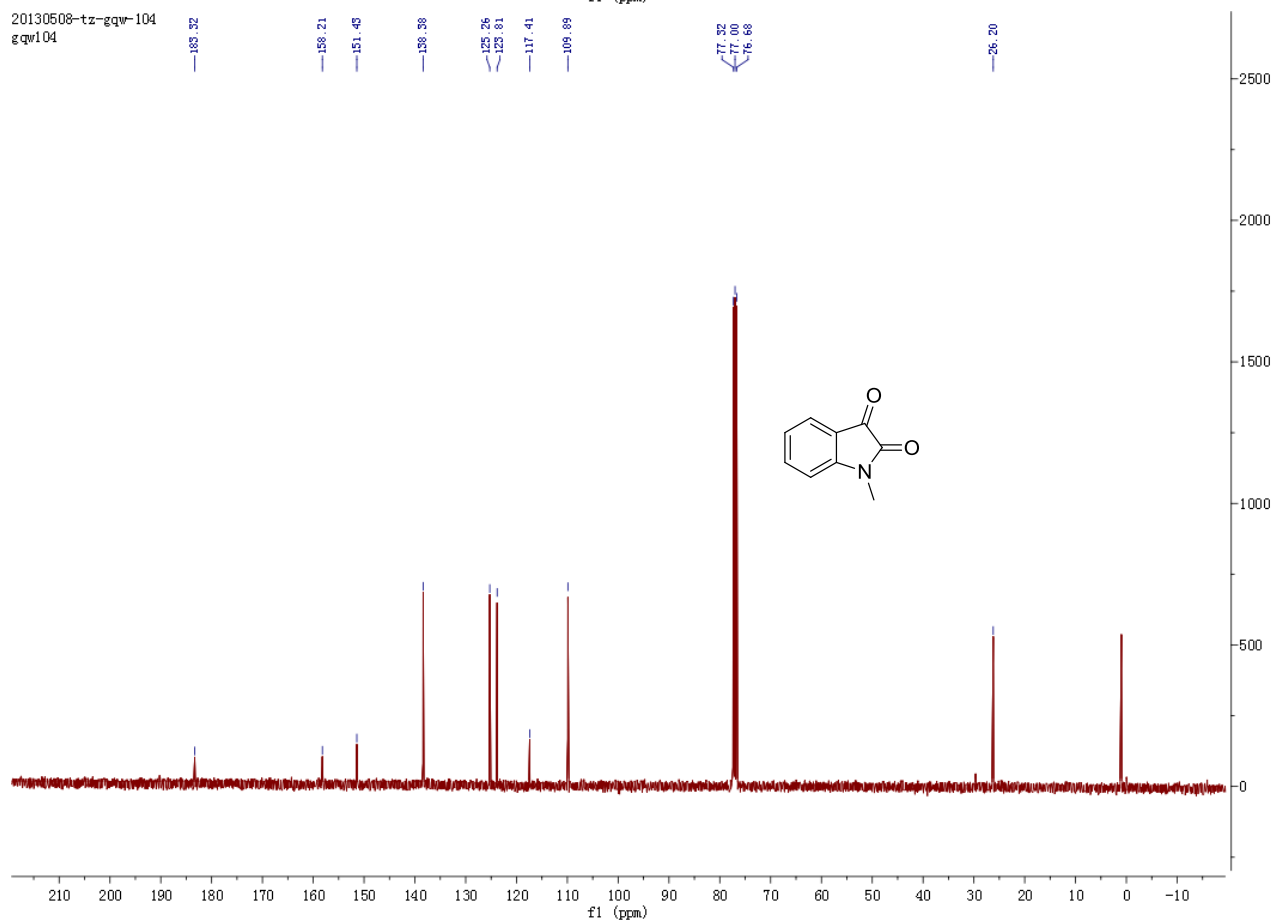

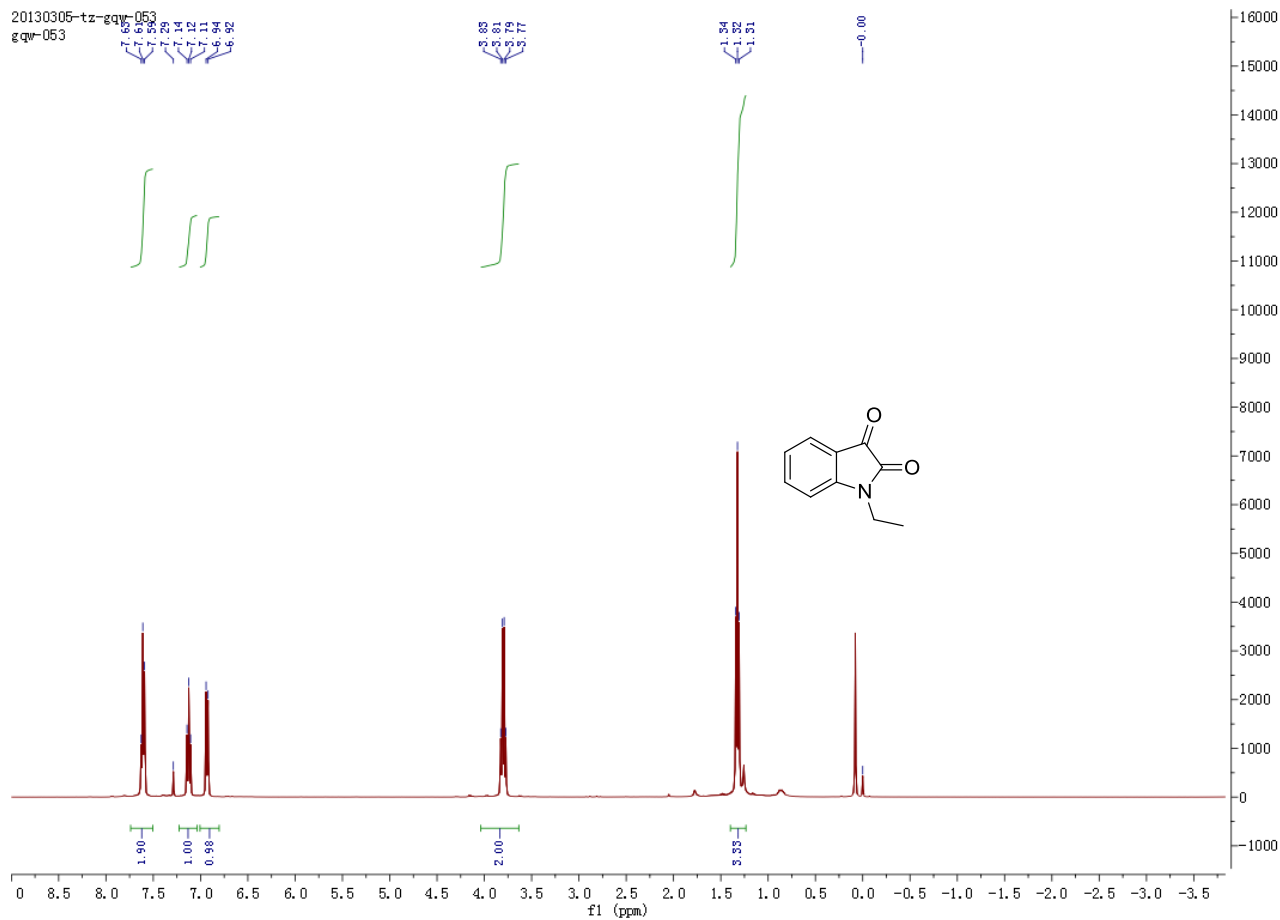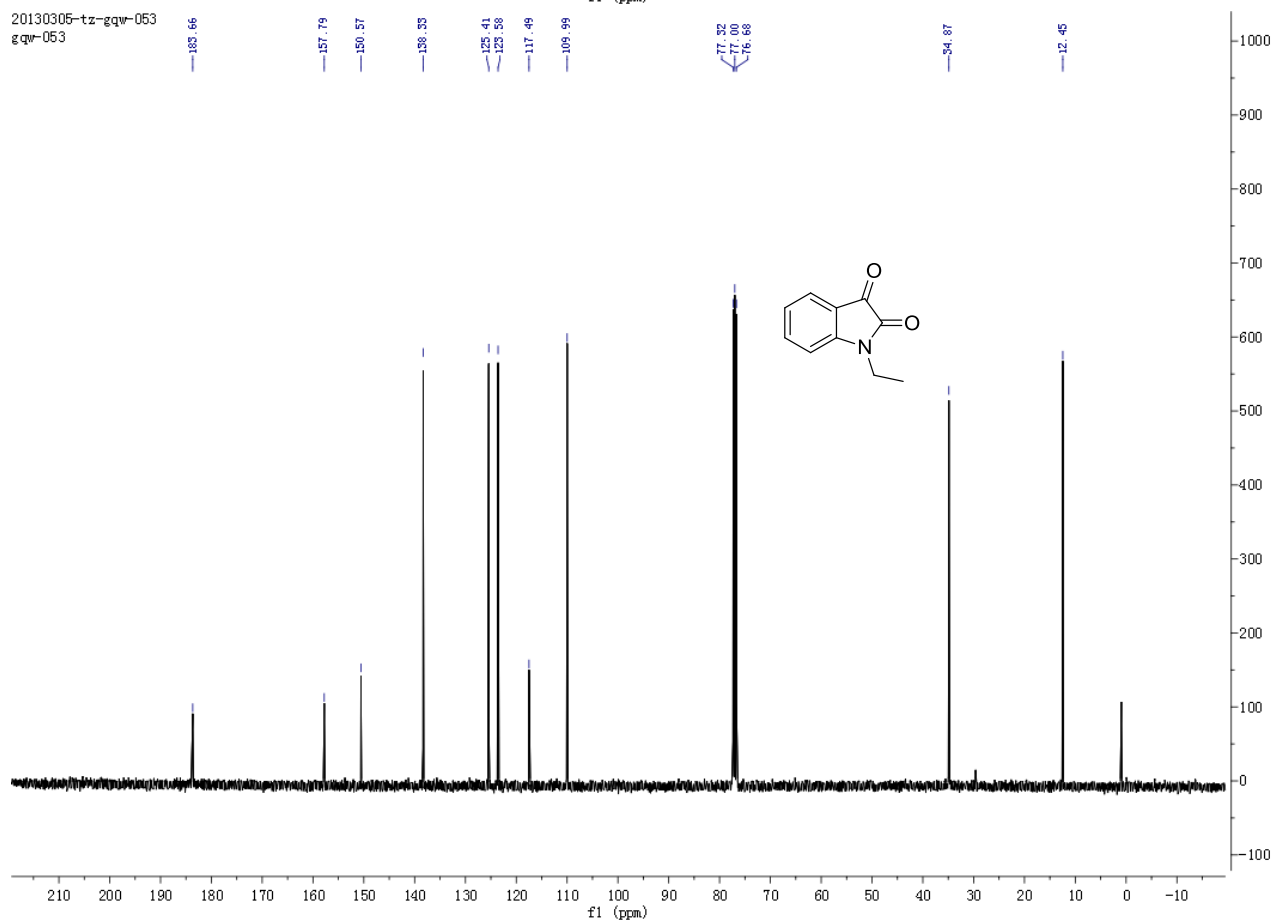

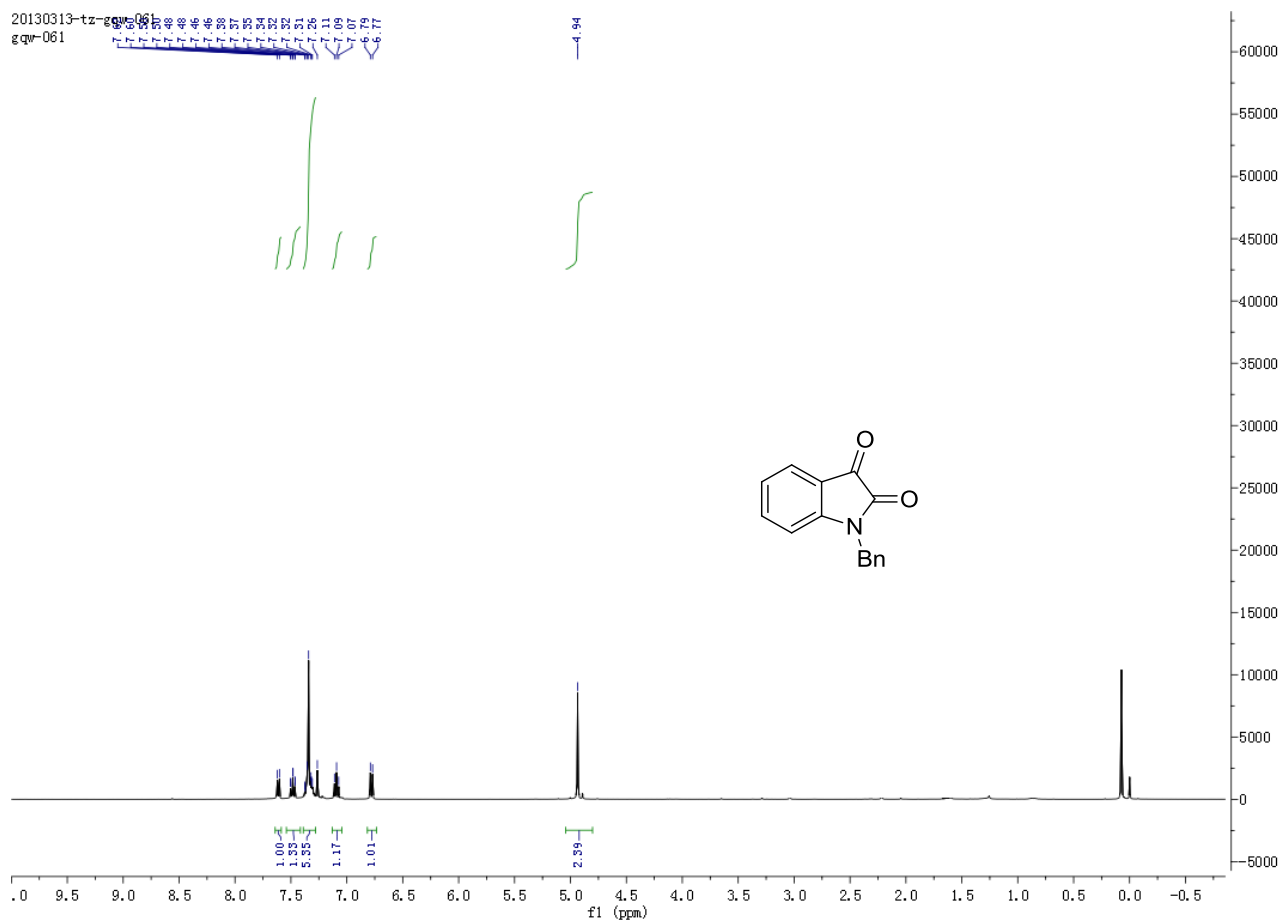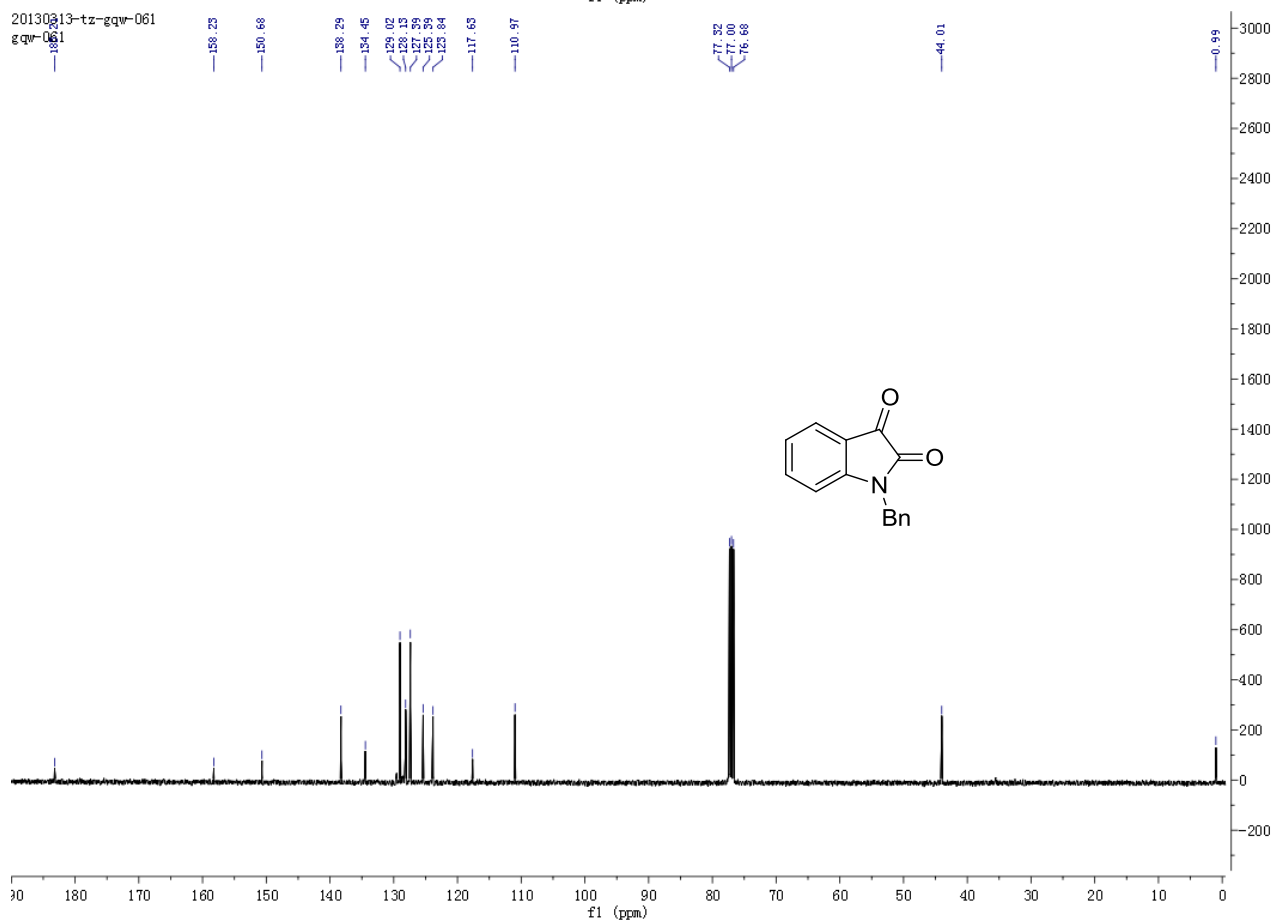

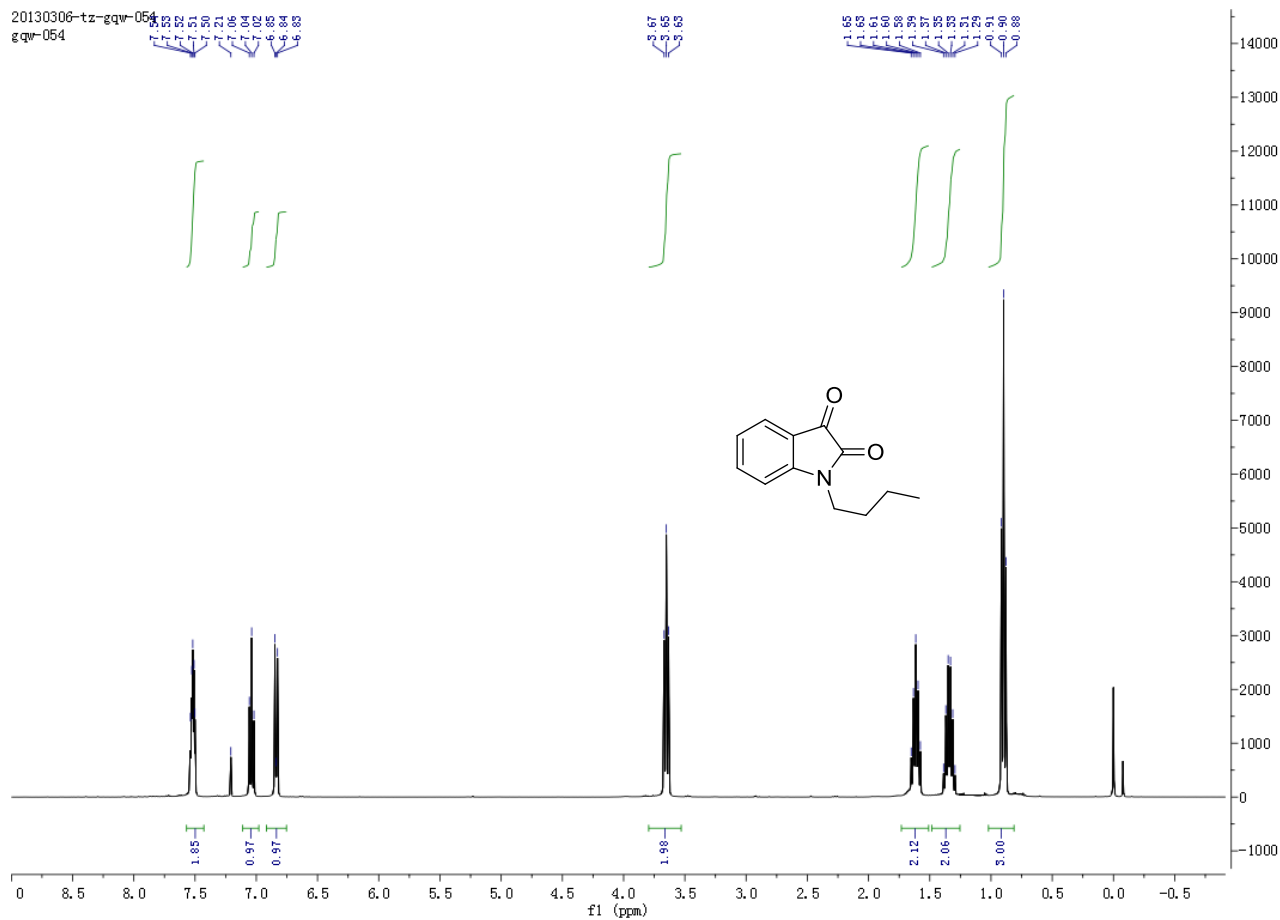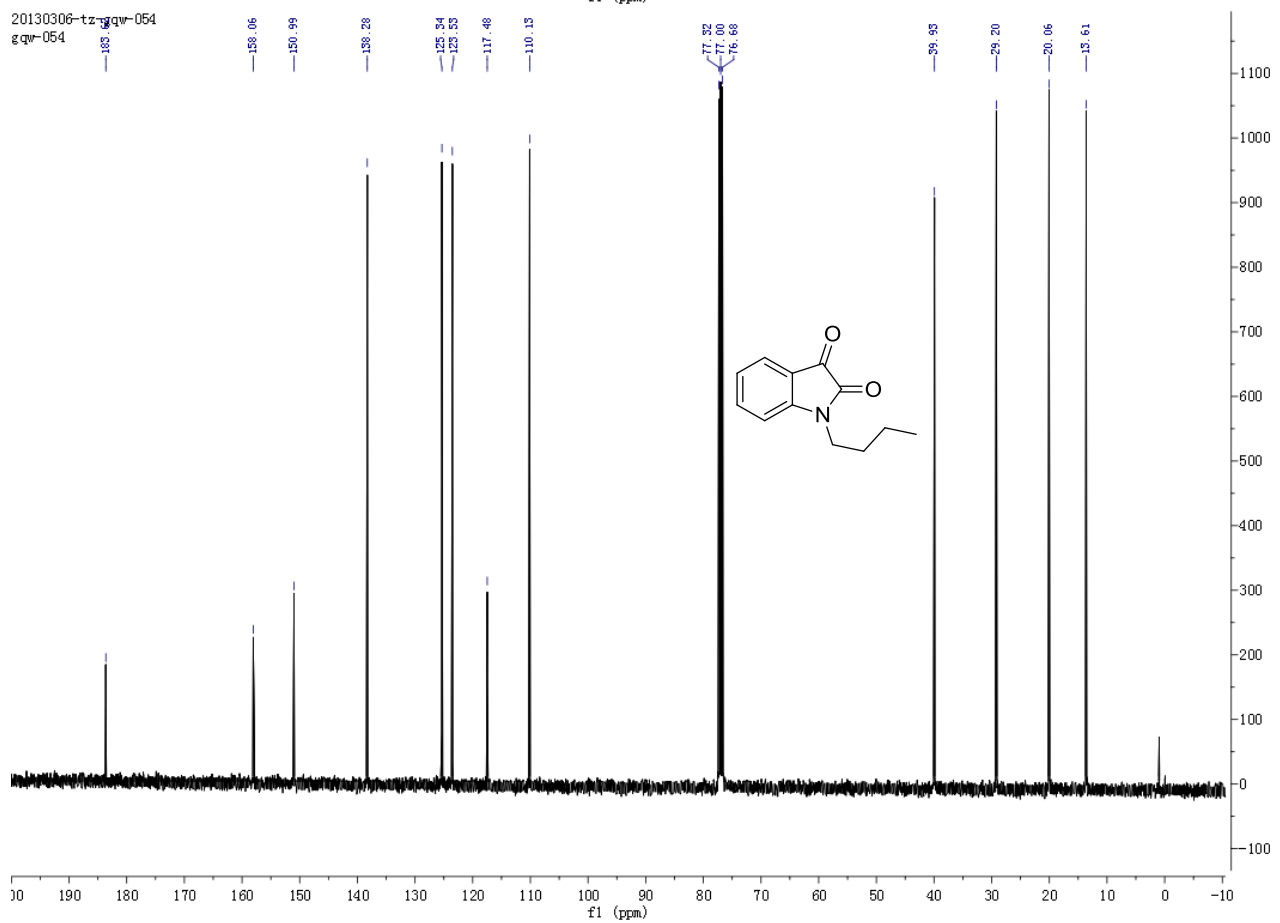

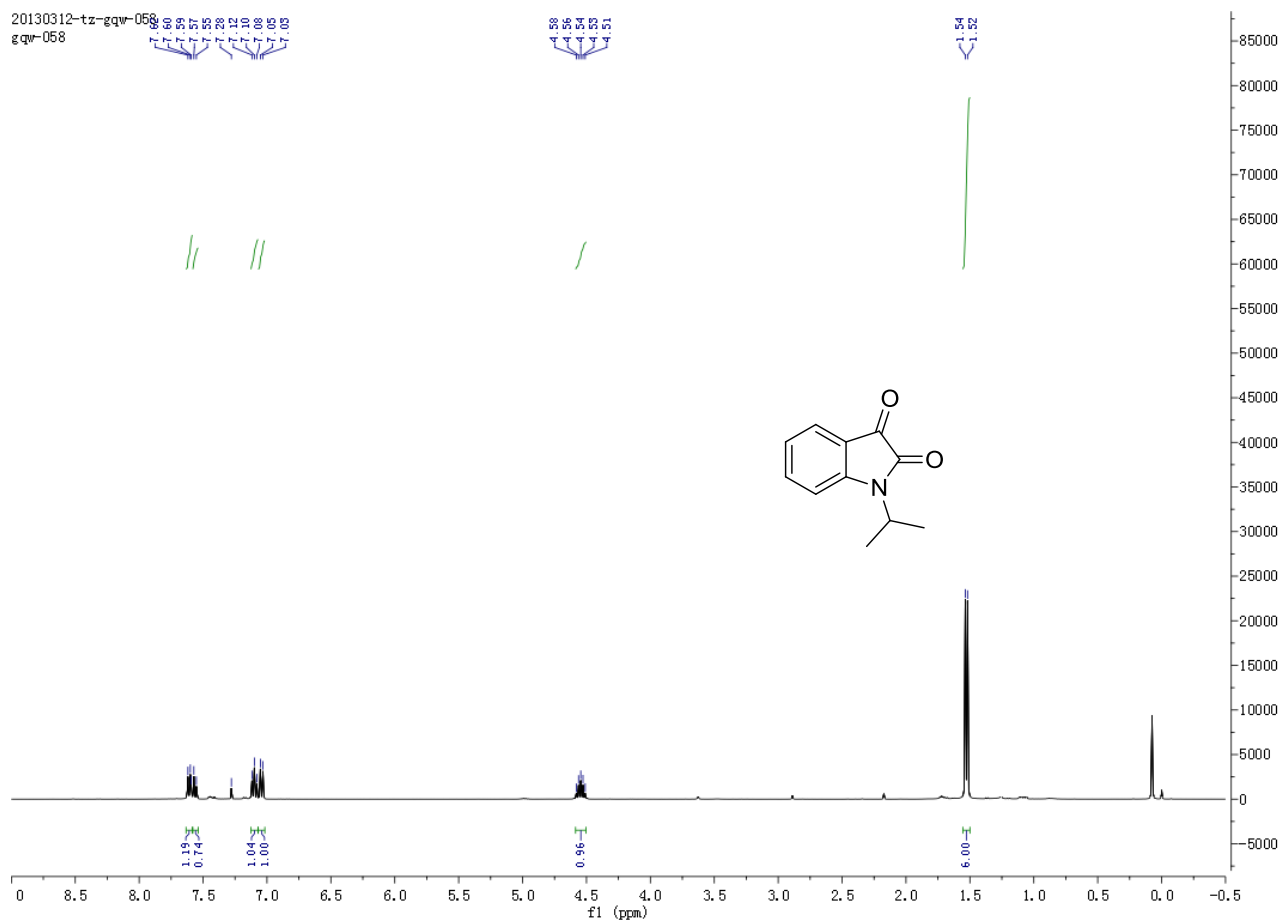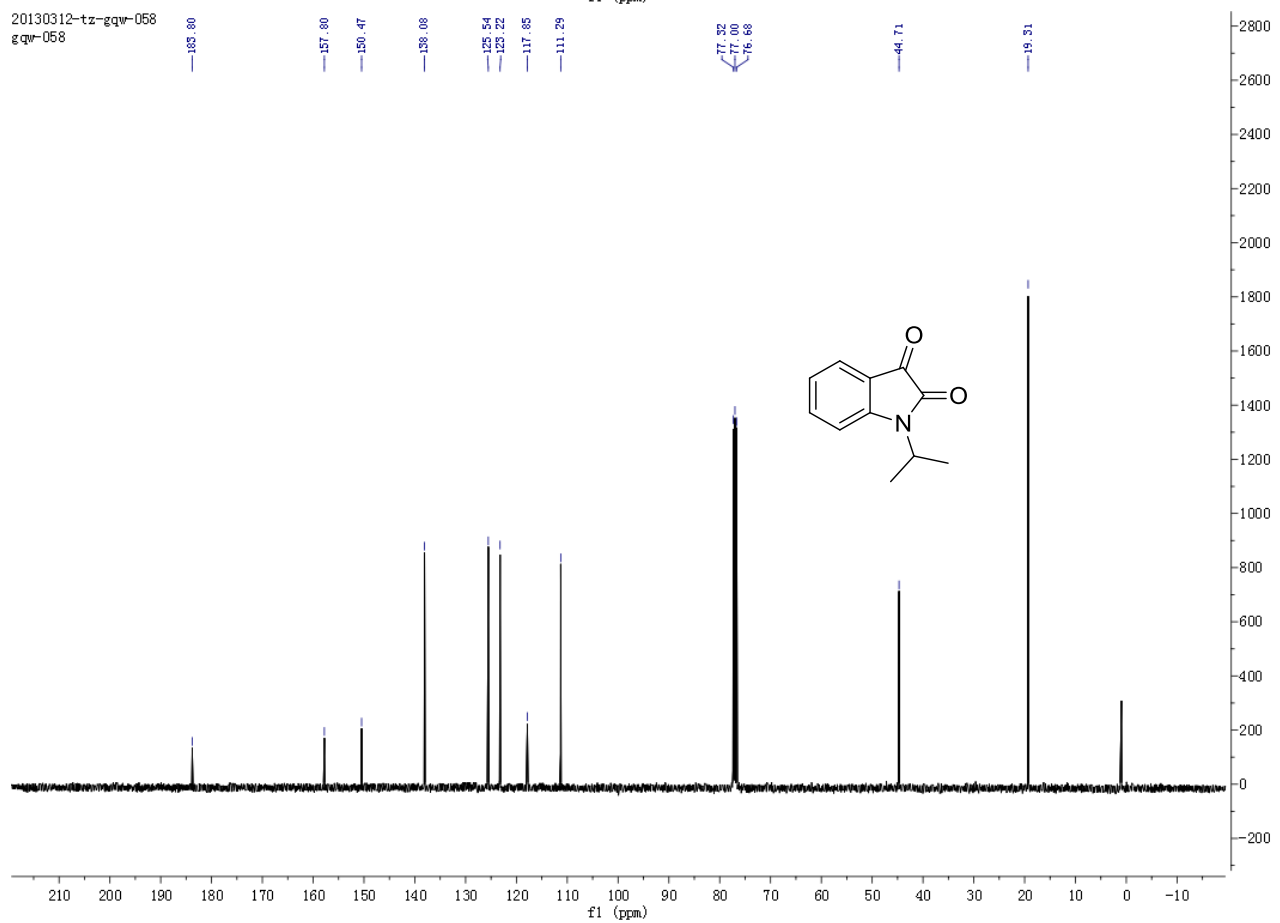

20130313-tz-gqw01  
gqw080

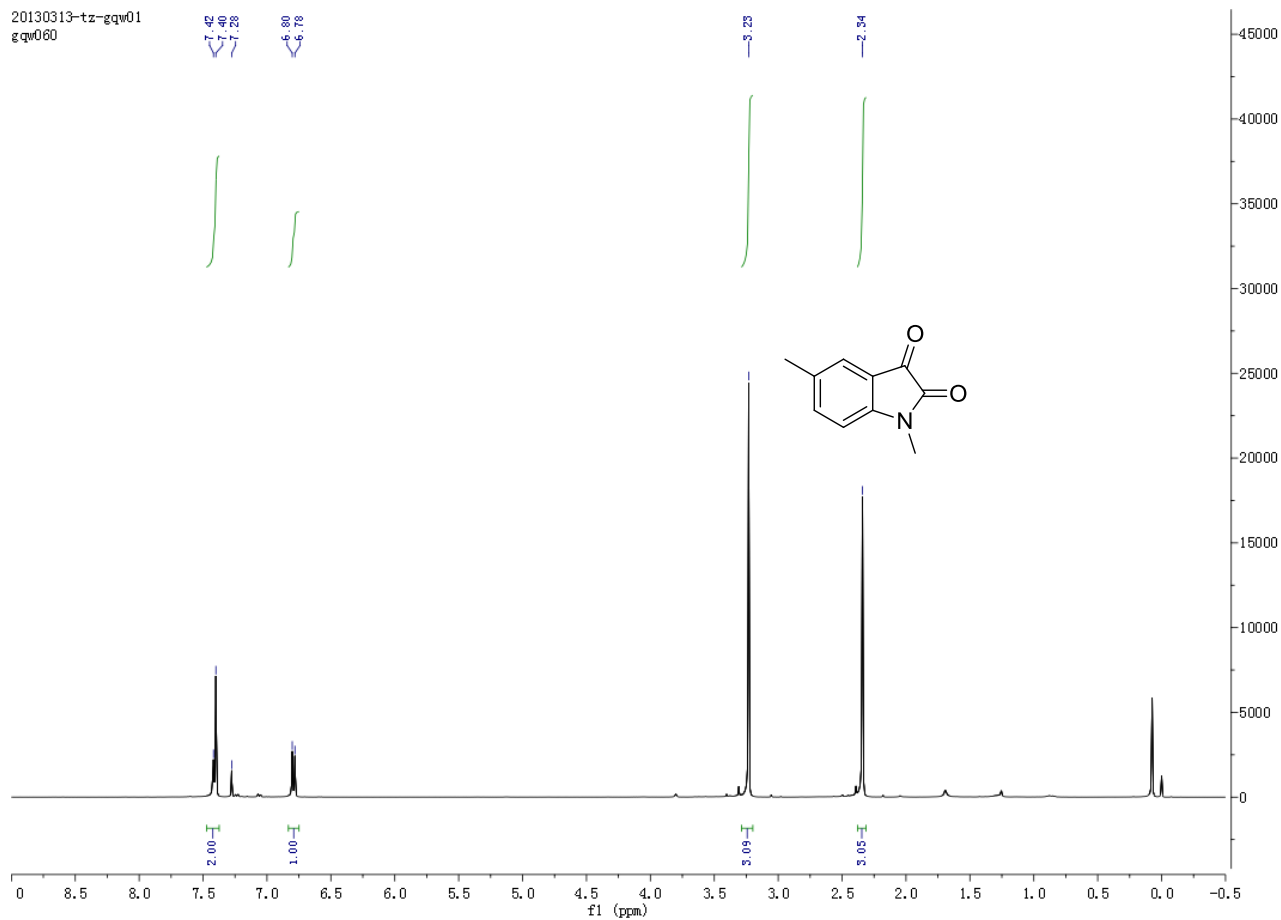

20130313-tz-gqw01  
gqw080

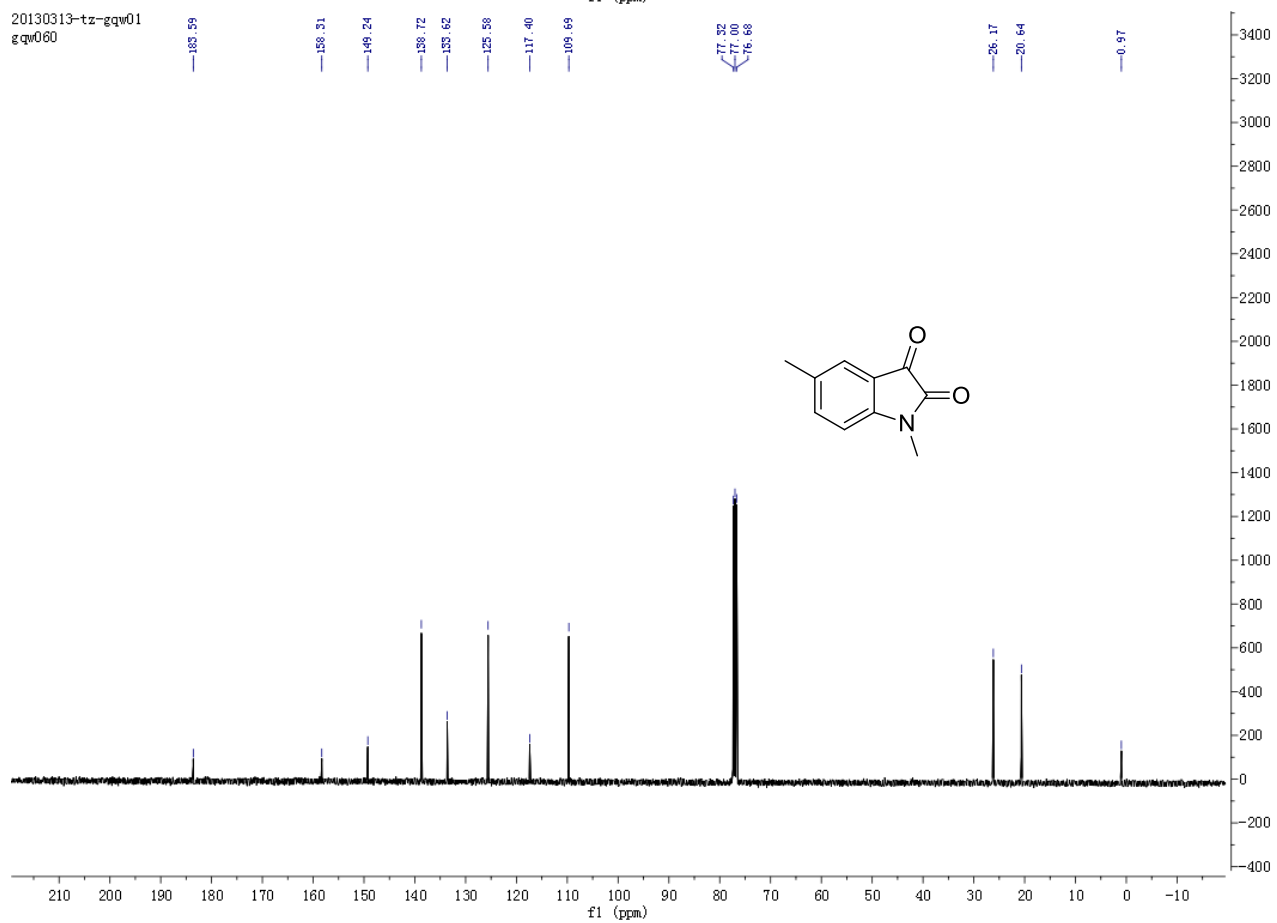

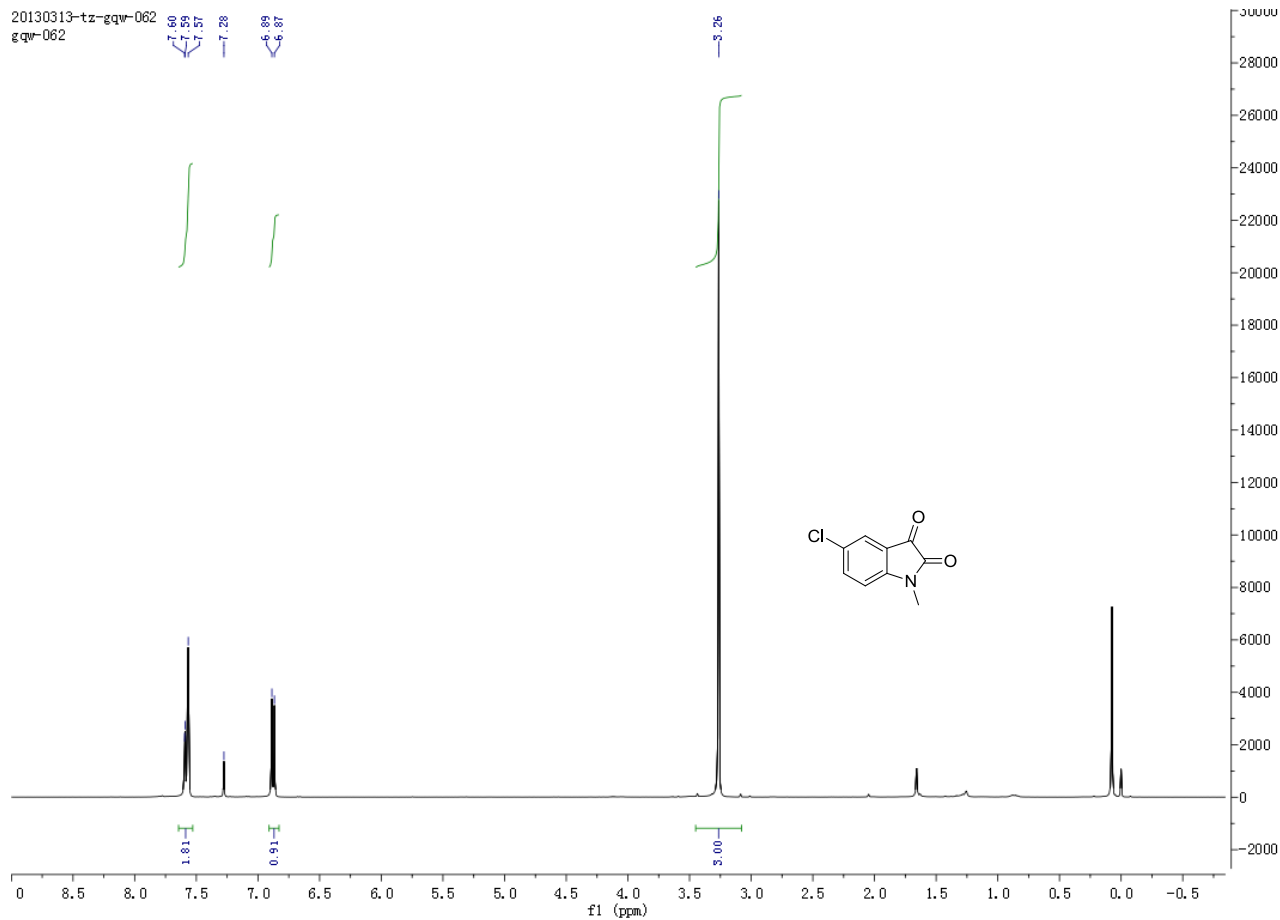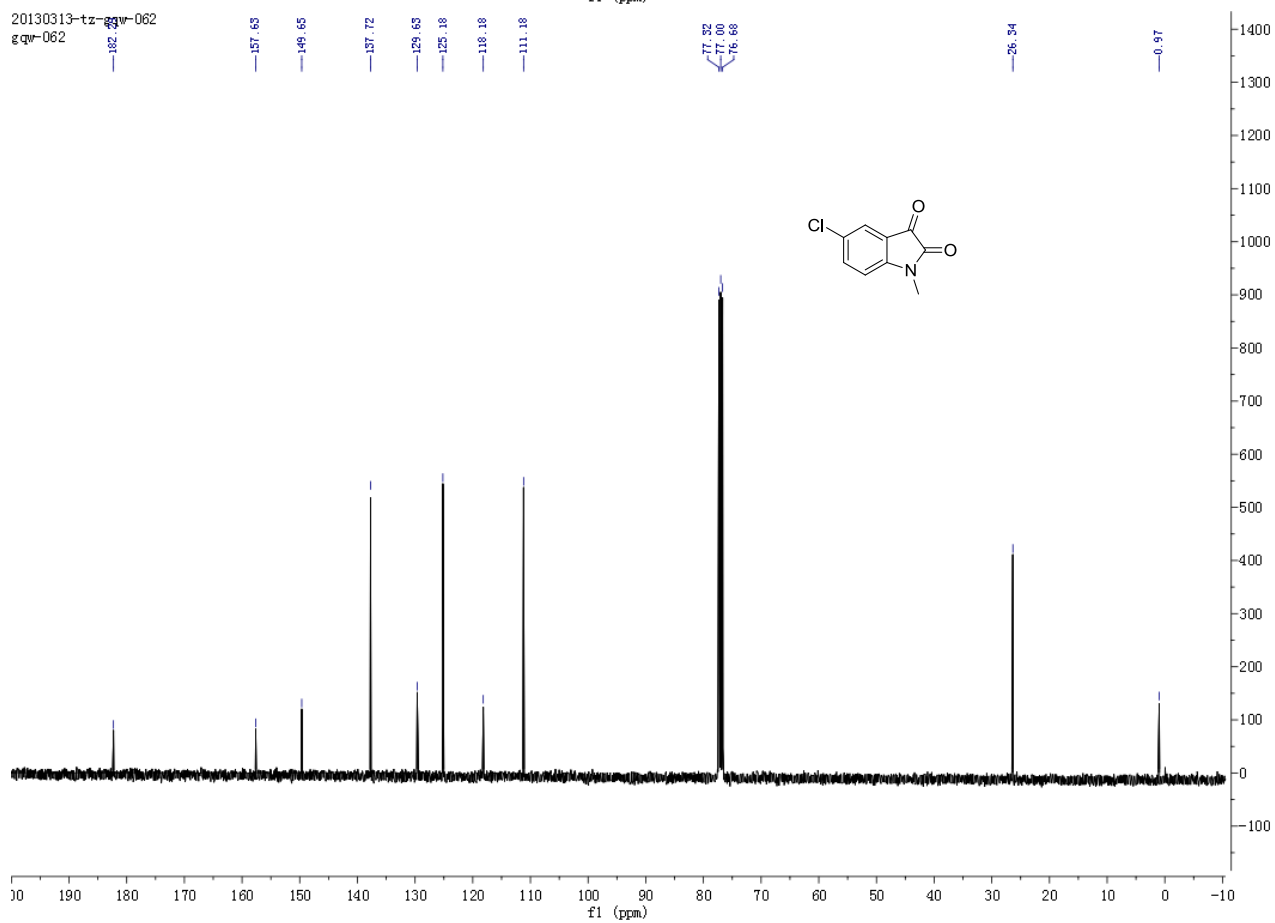



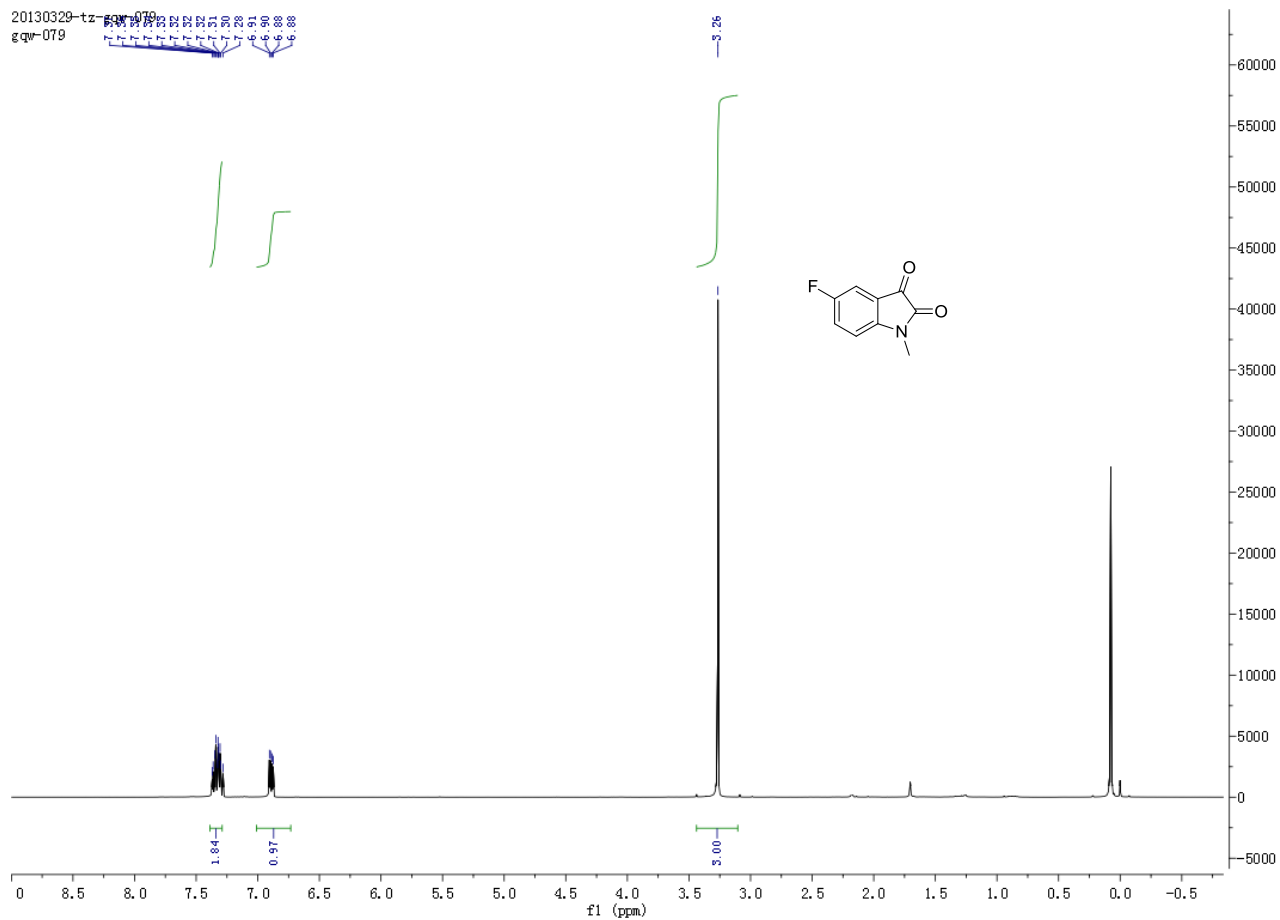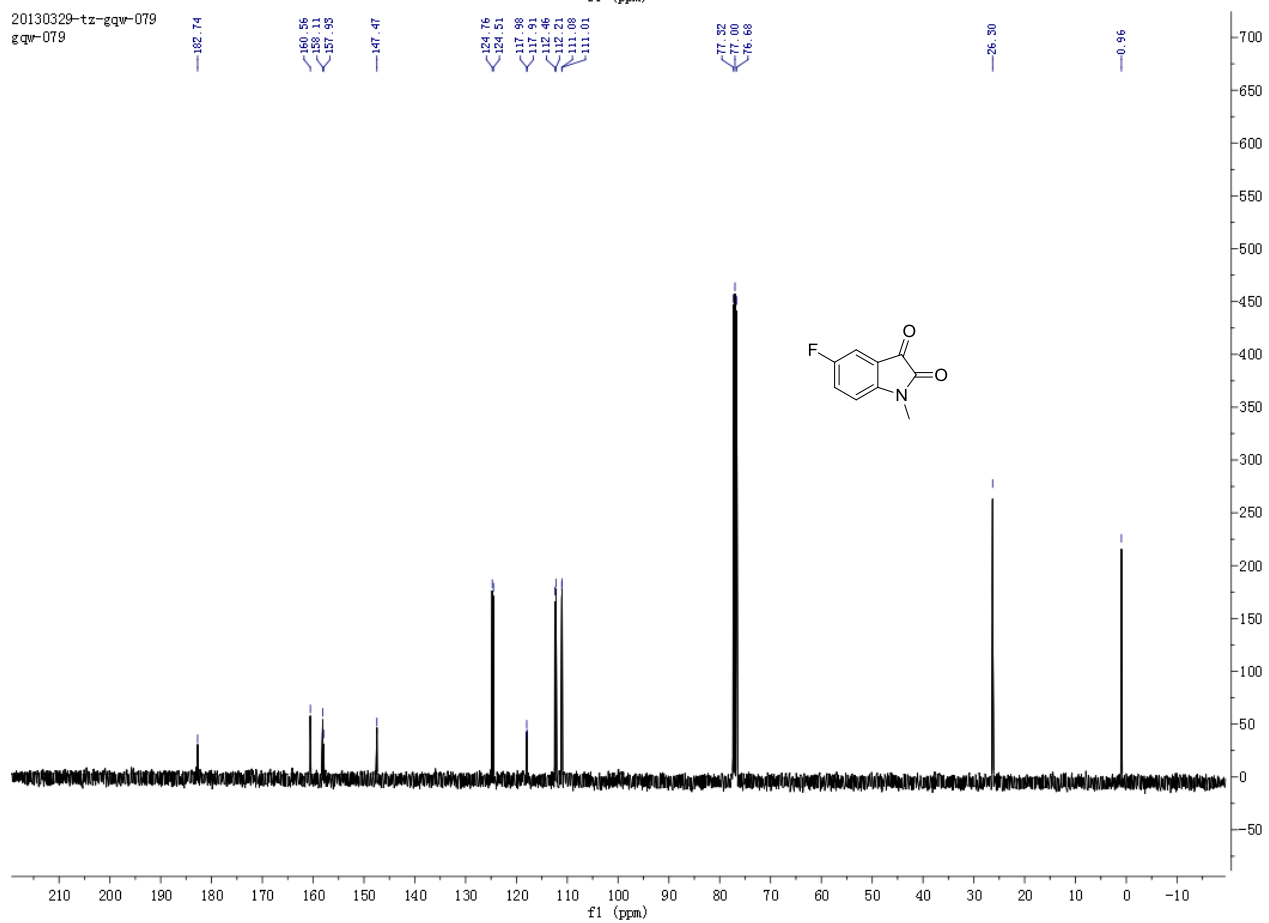

20130419-tz-gqw-96  
gqw-96

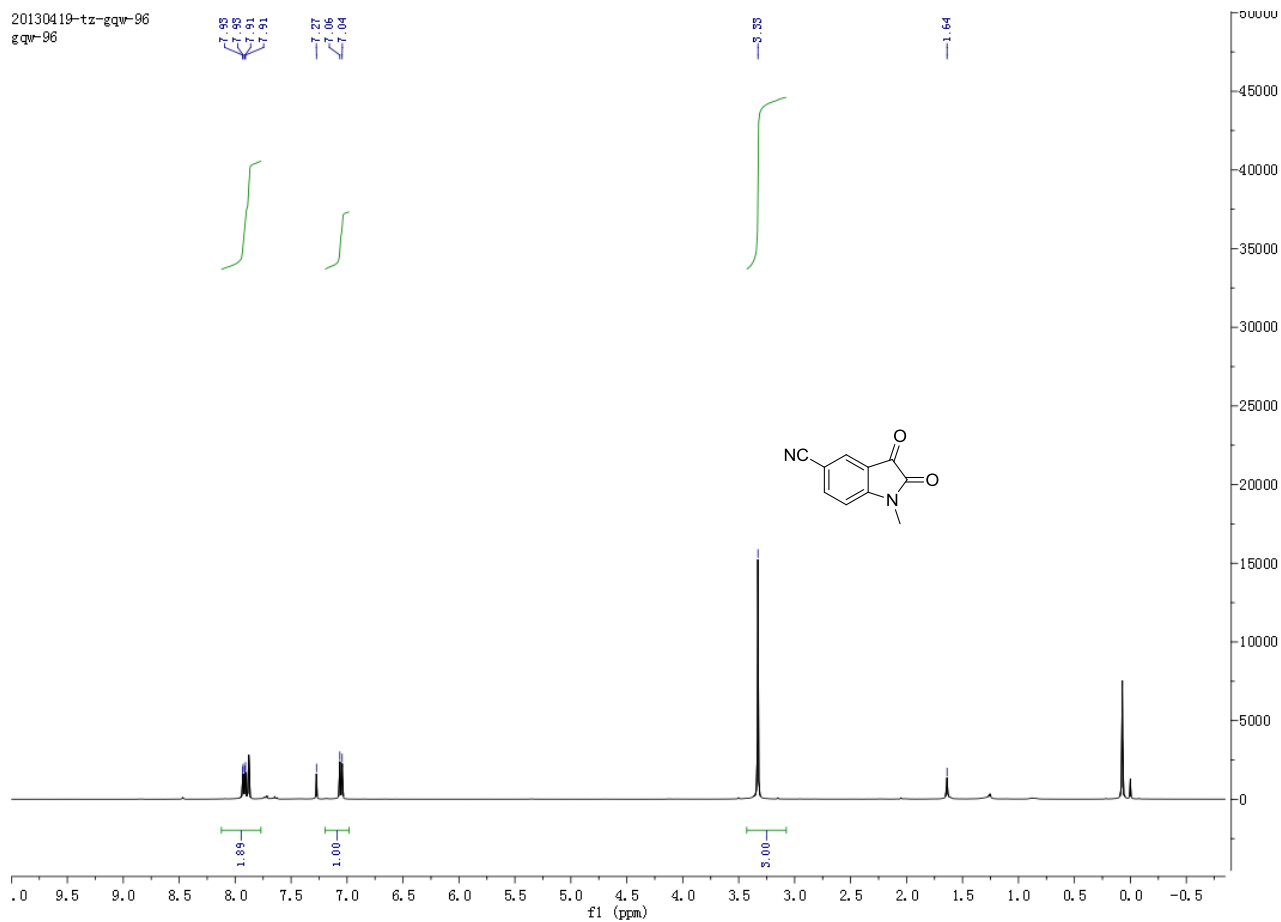

20130419-tz-gqw-96  
gqw-96

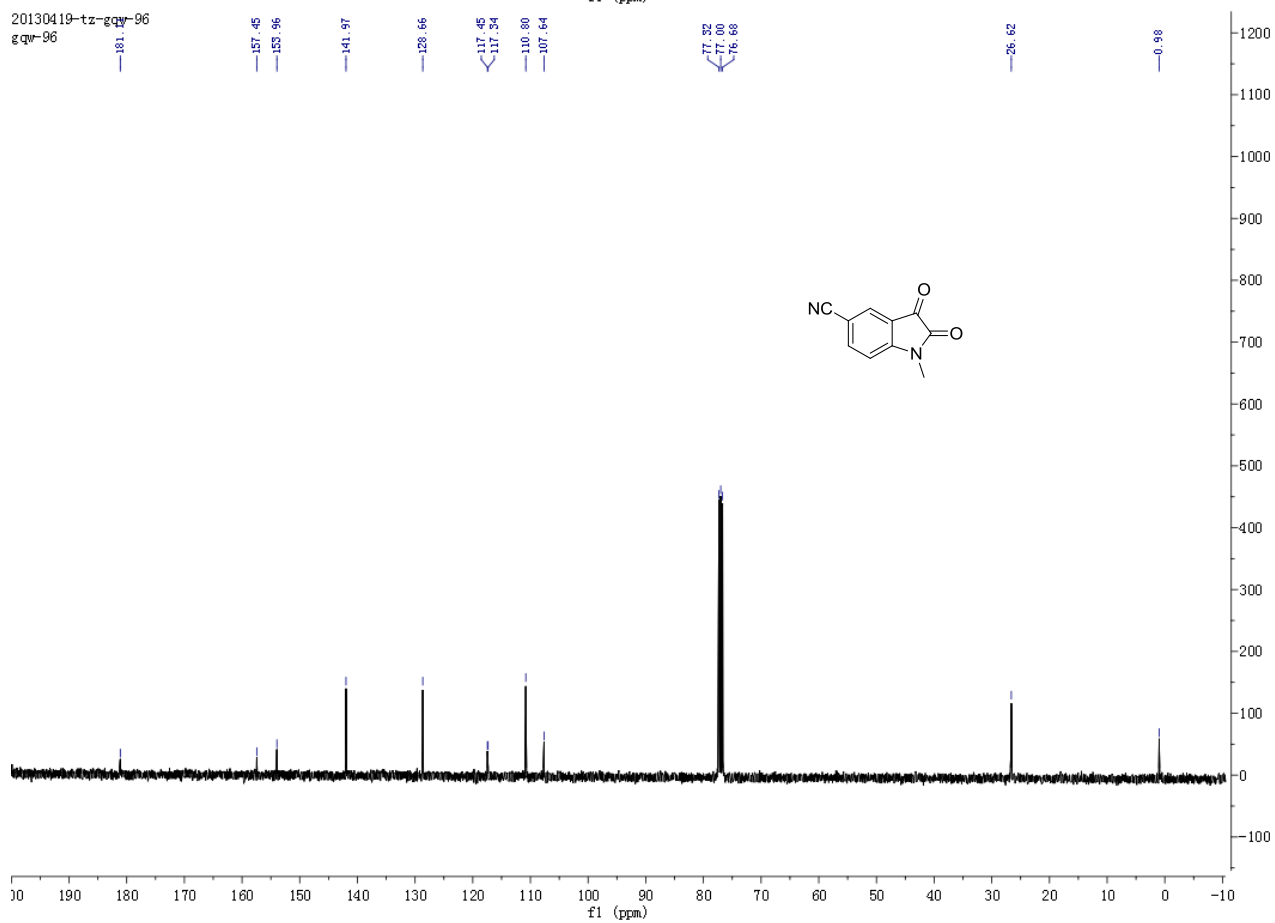

20130319-tz-gqw-66  
gqw-66

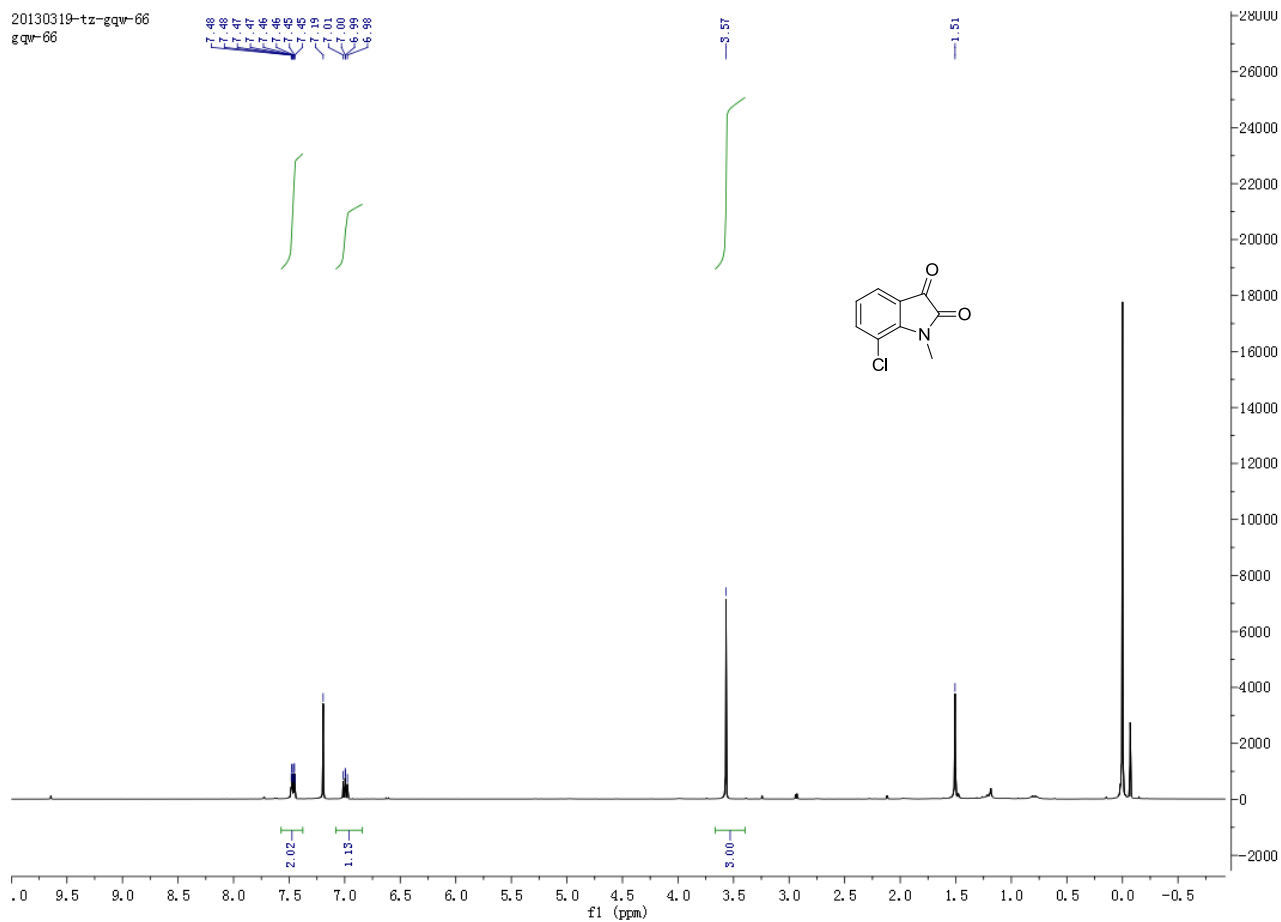

20130329-tz-gqw-066  
gqw-066

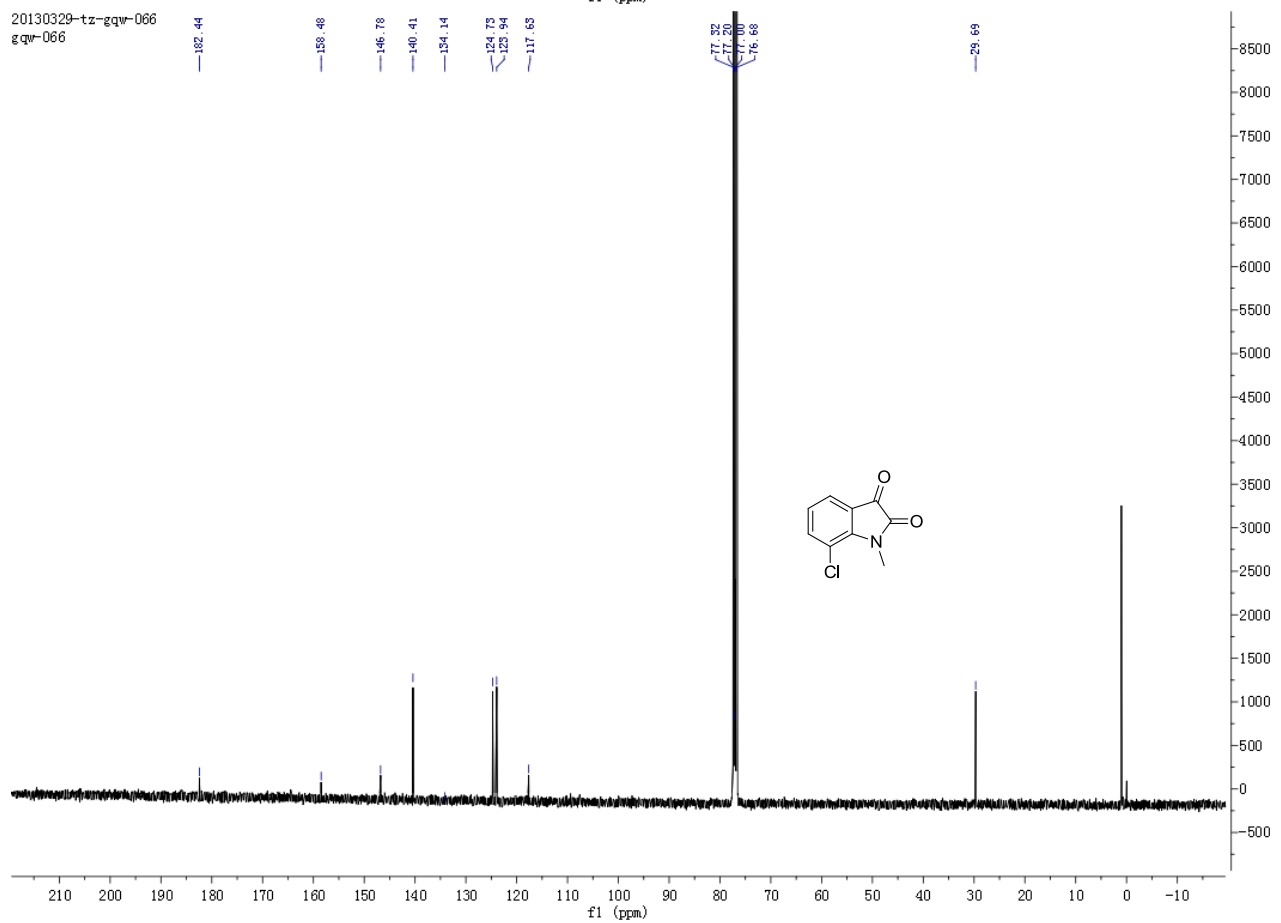

20130318-tz-gqw-63  
gqw-63

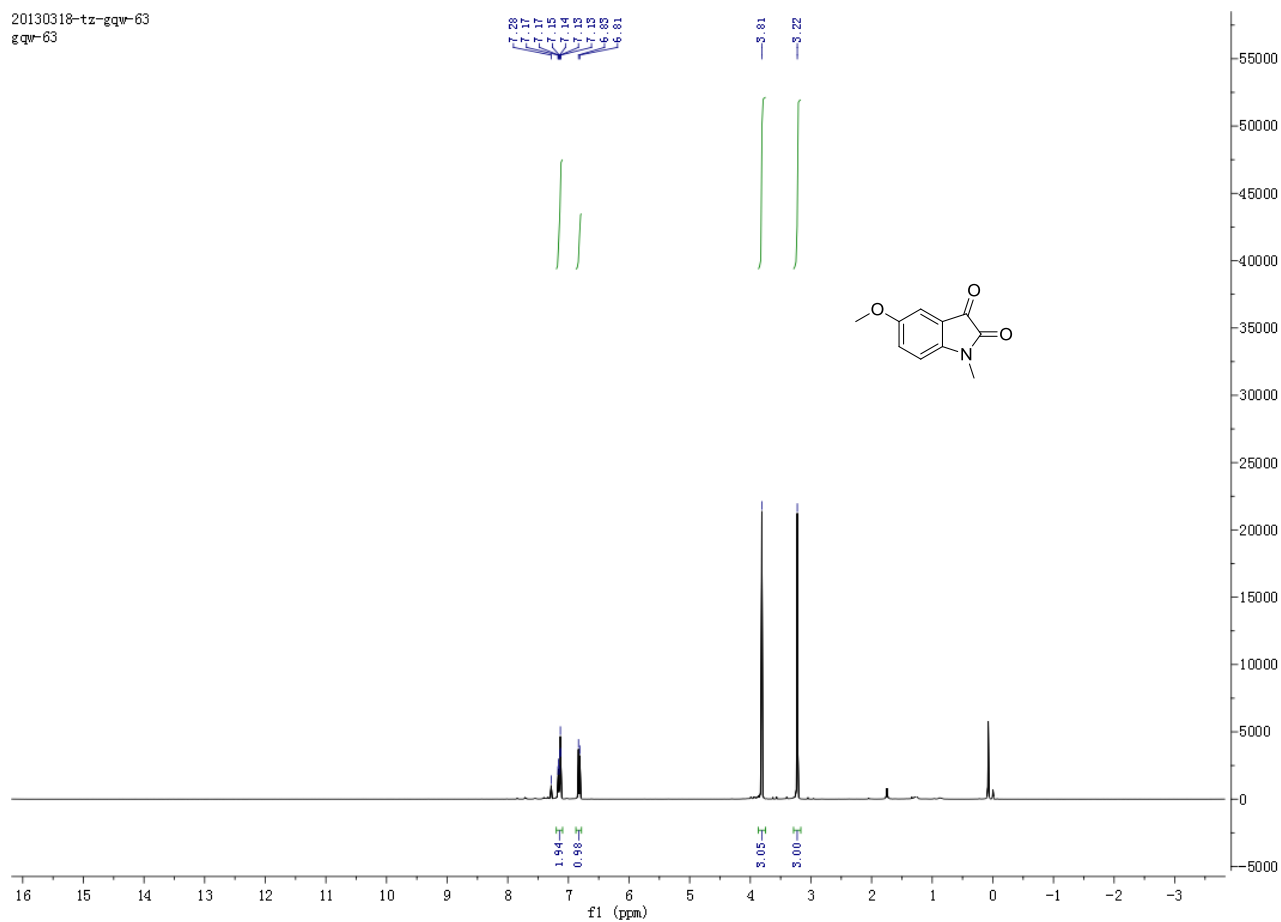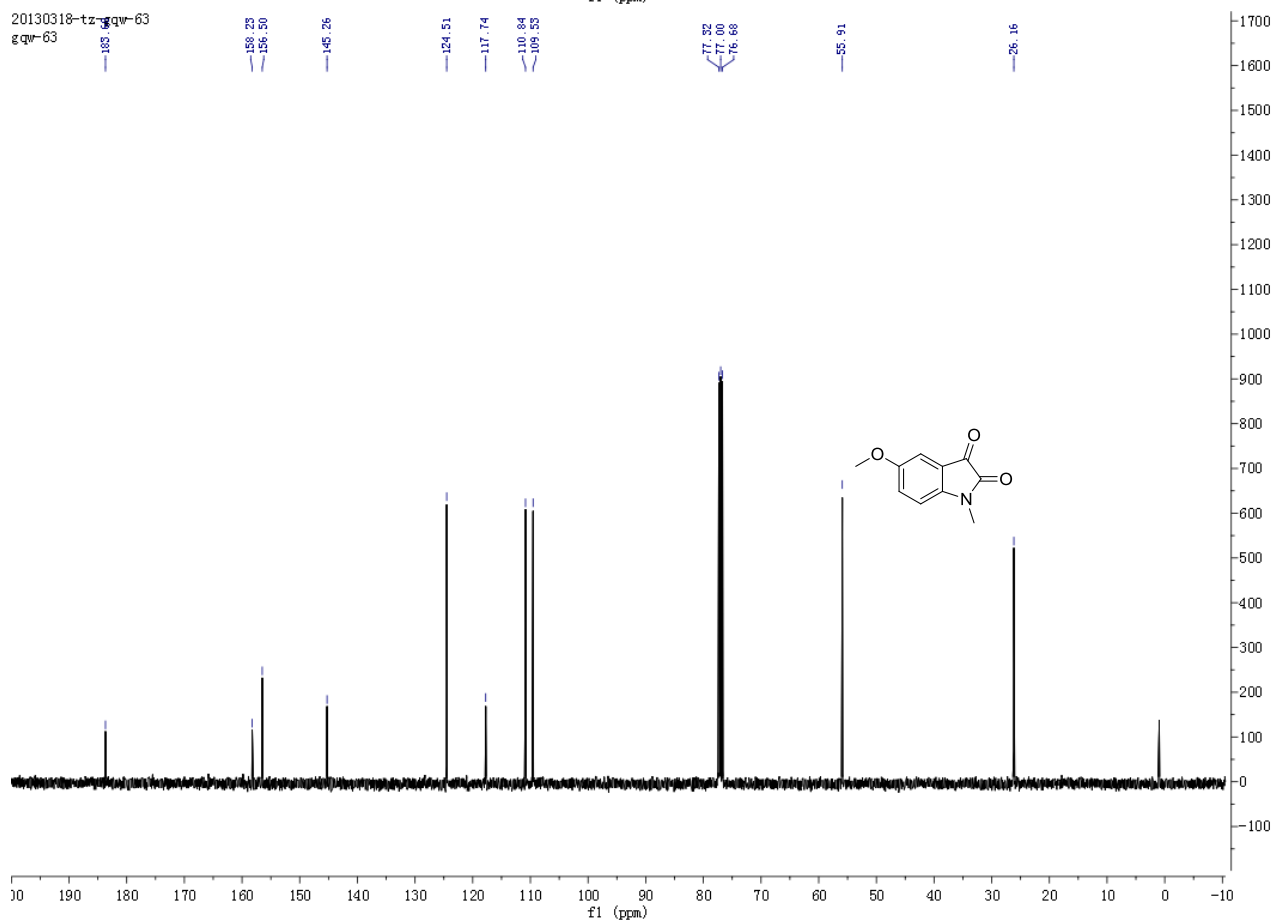

20130410-tz-gqw-085  
gqw085

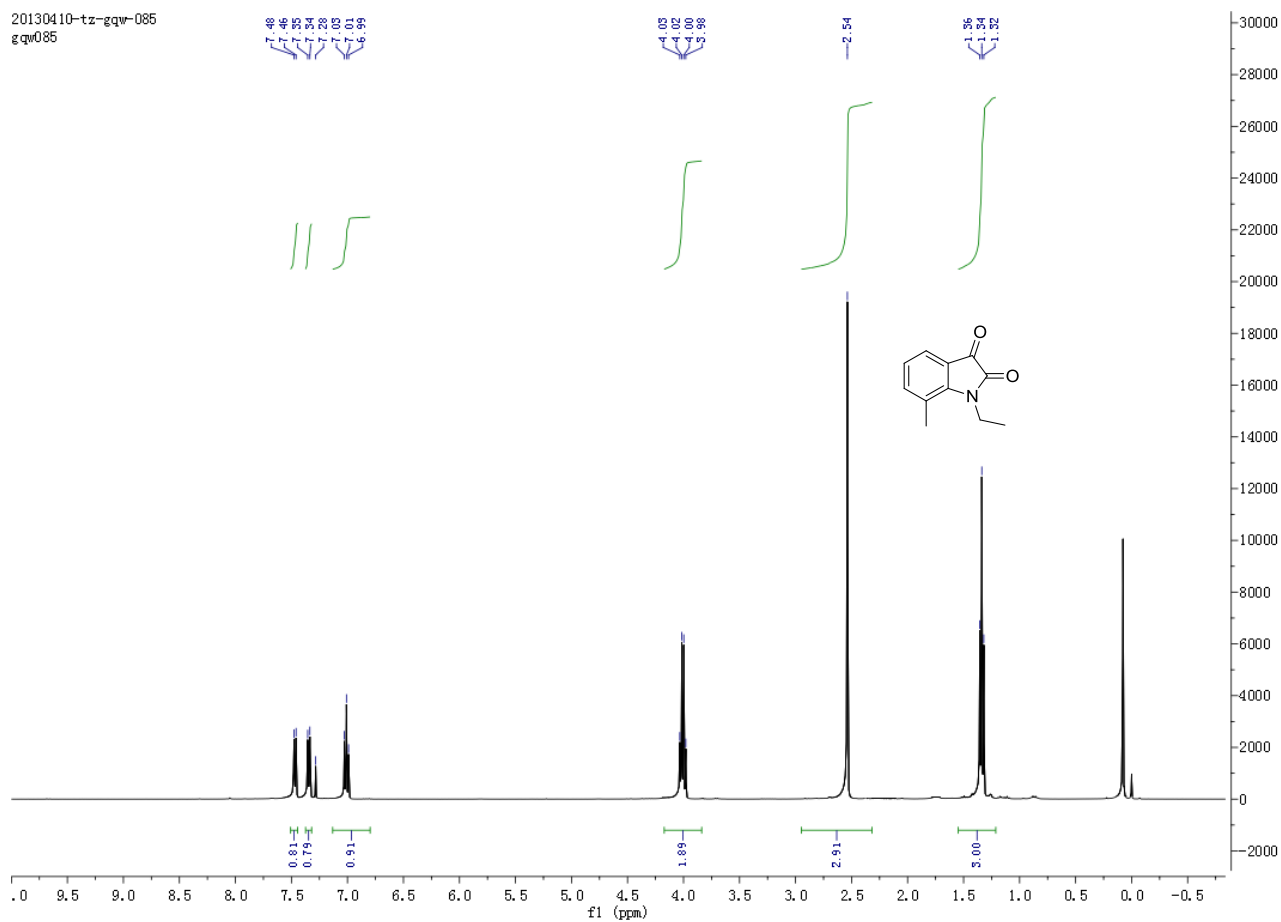

20130410-tz-gqw-085  
gqw085

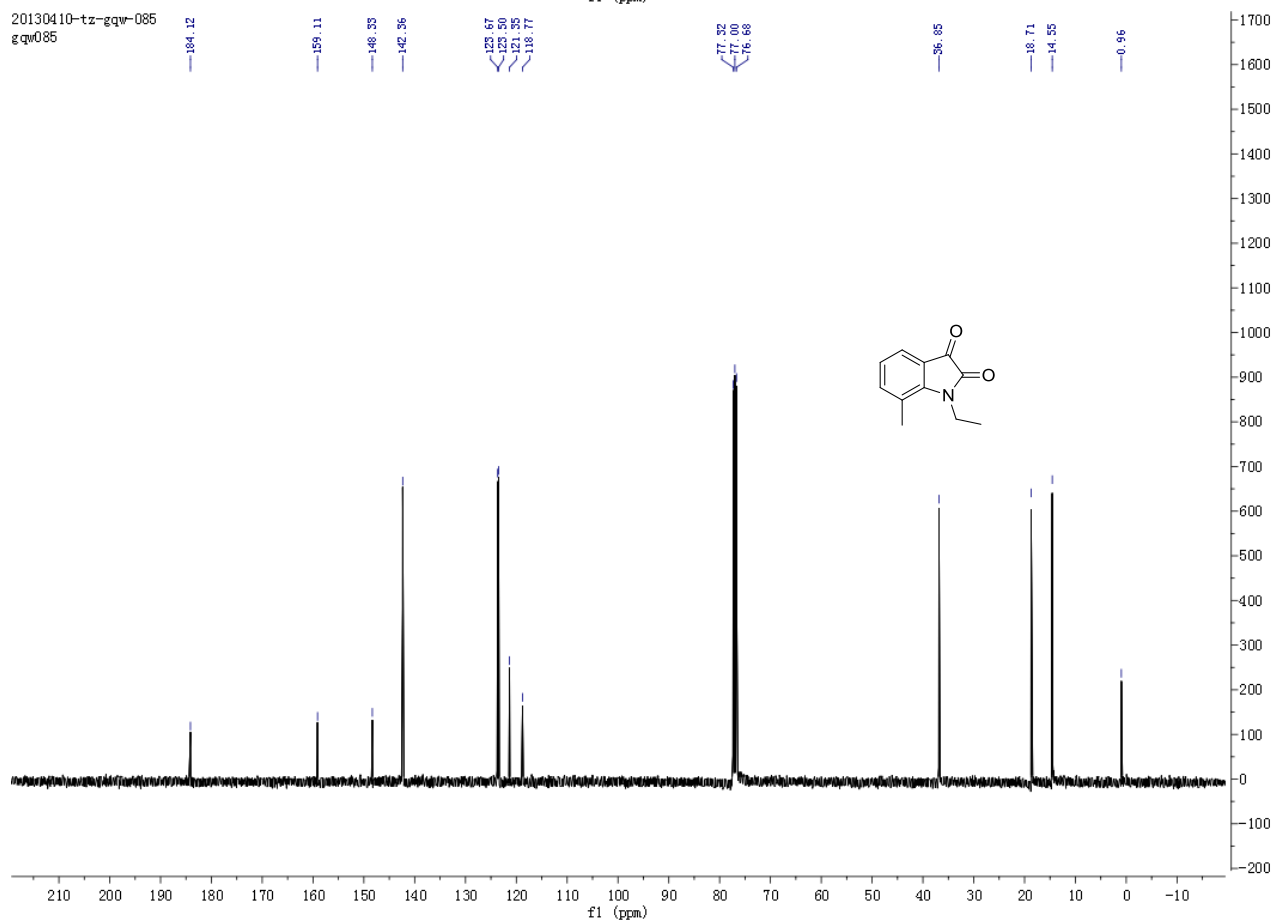

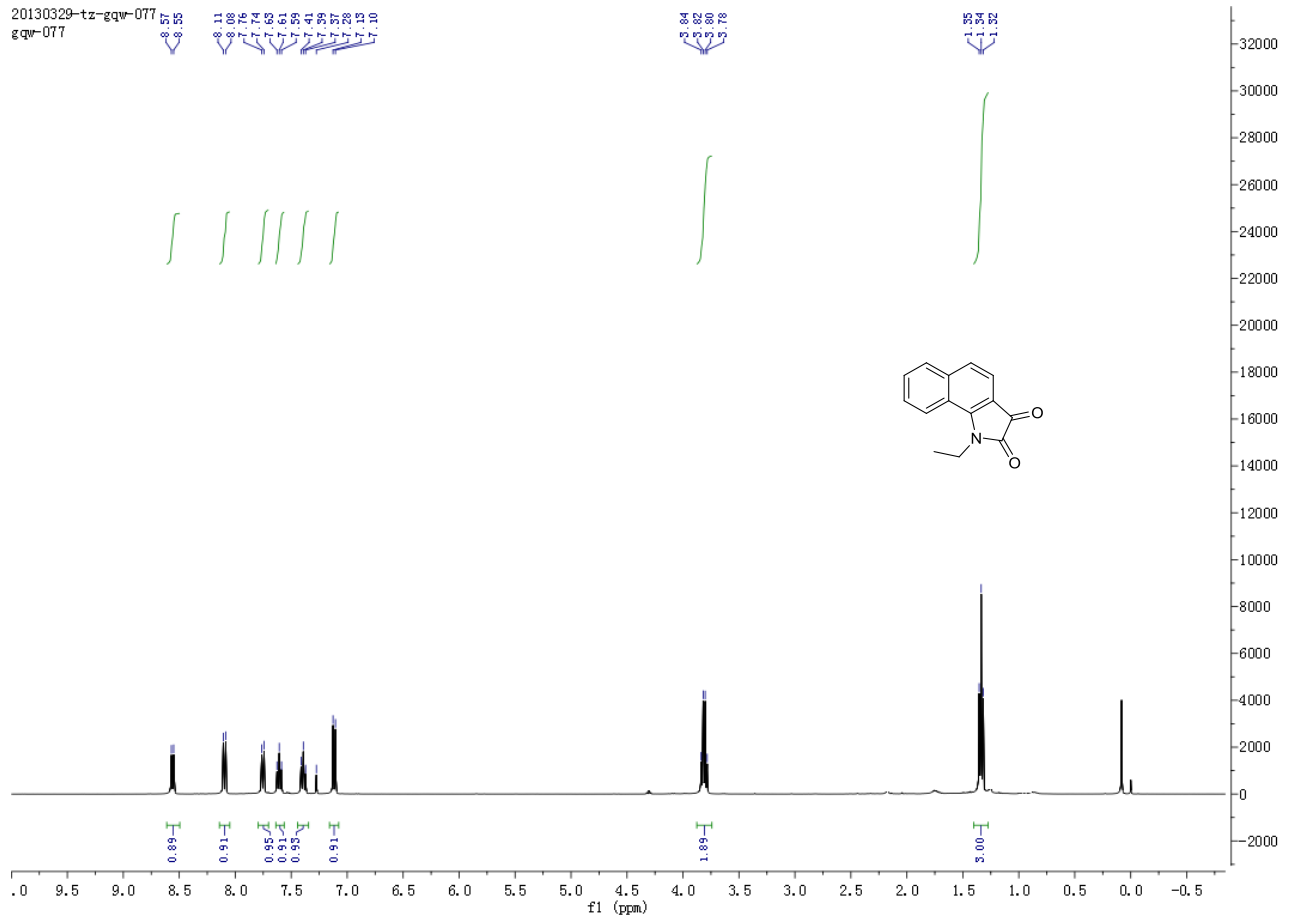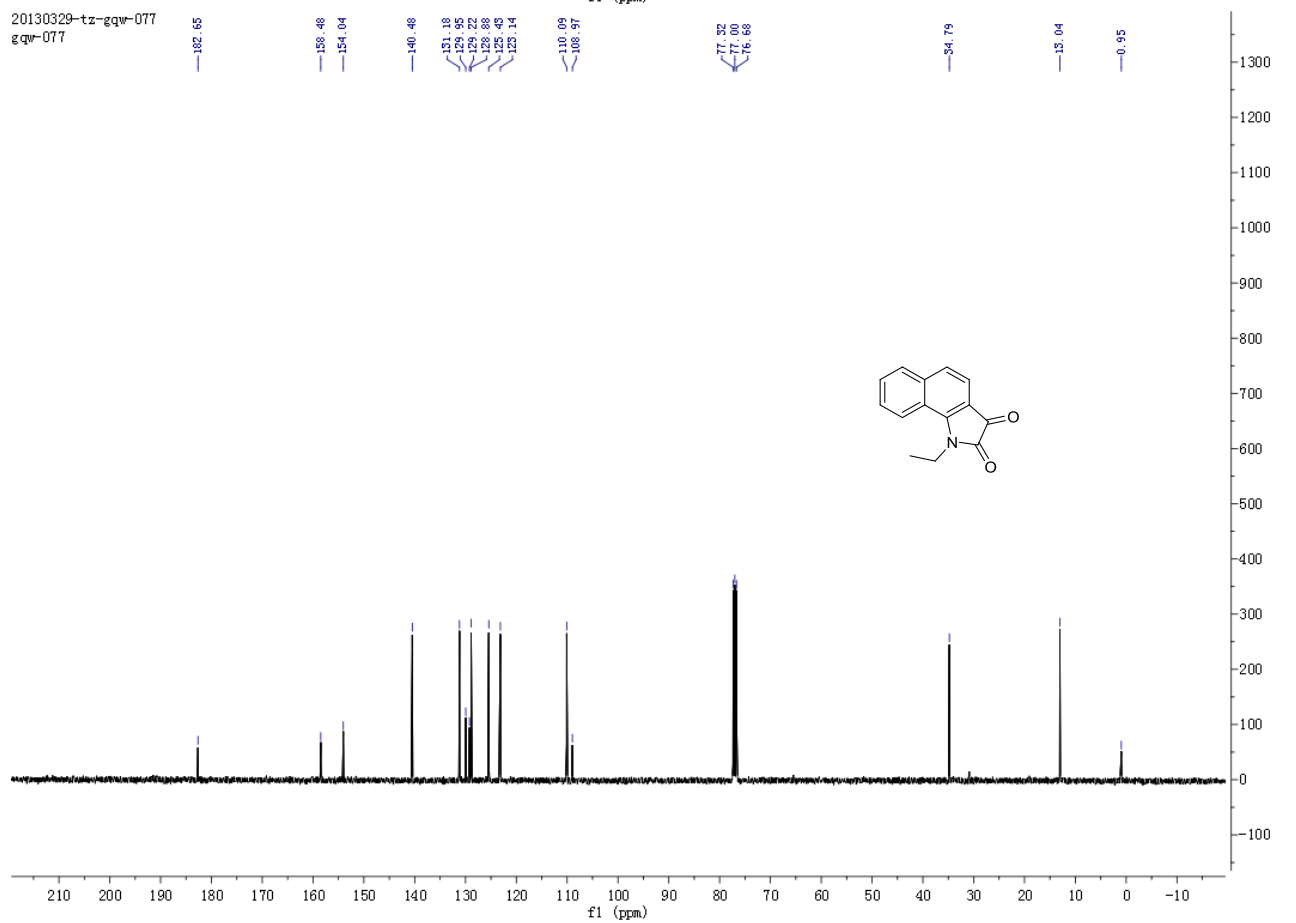

20130407-tz-gqw-83  
gqw-83

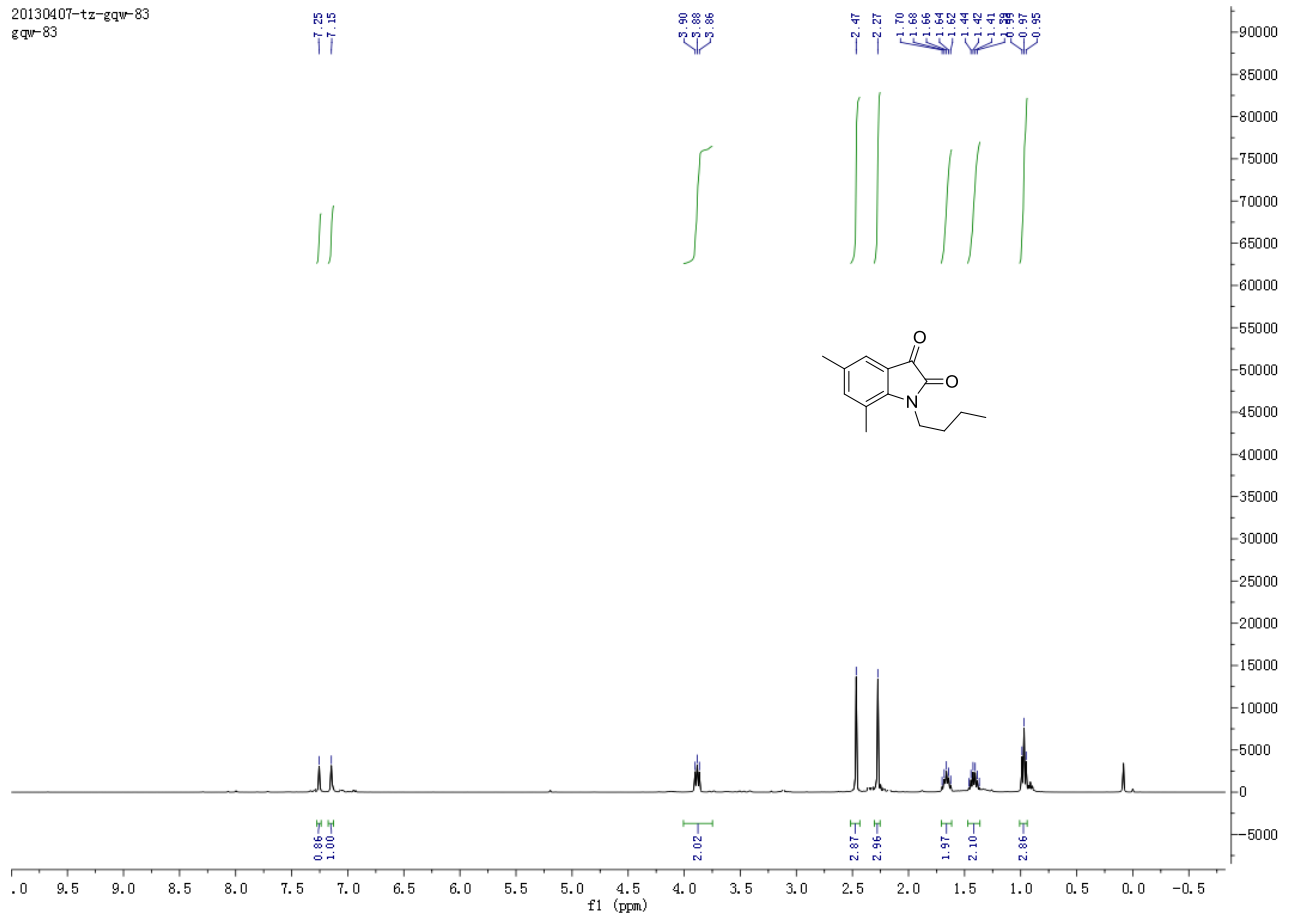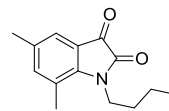

20130407-tz-gqw-83  
gqw-83

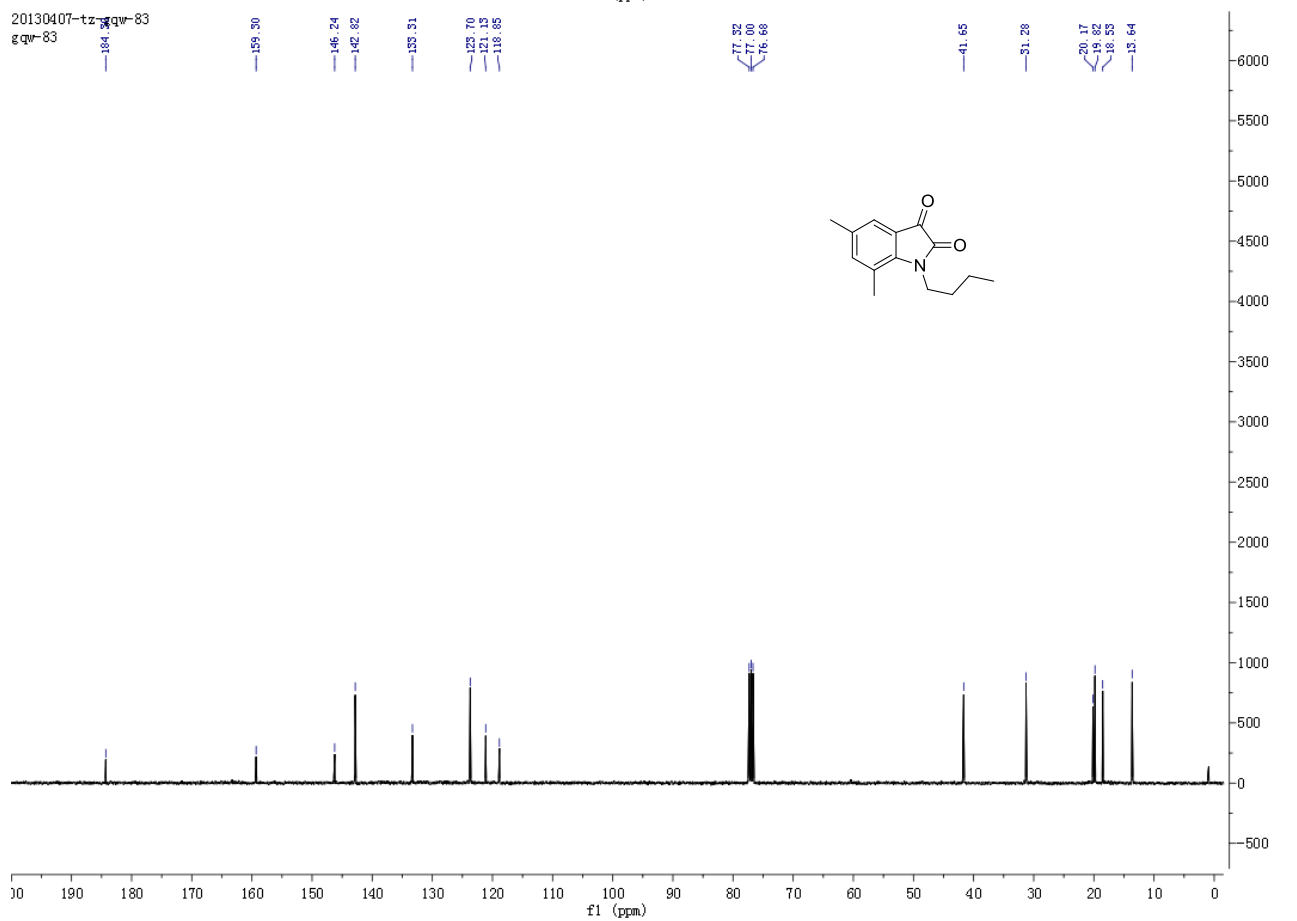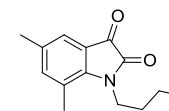

20130412-tz-gqr-088  
gqr-088

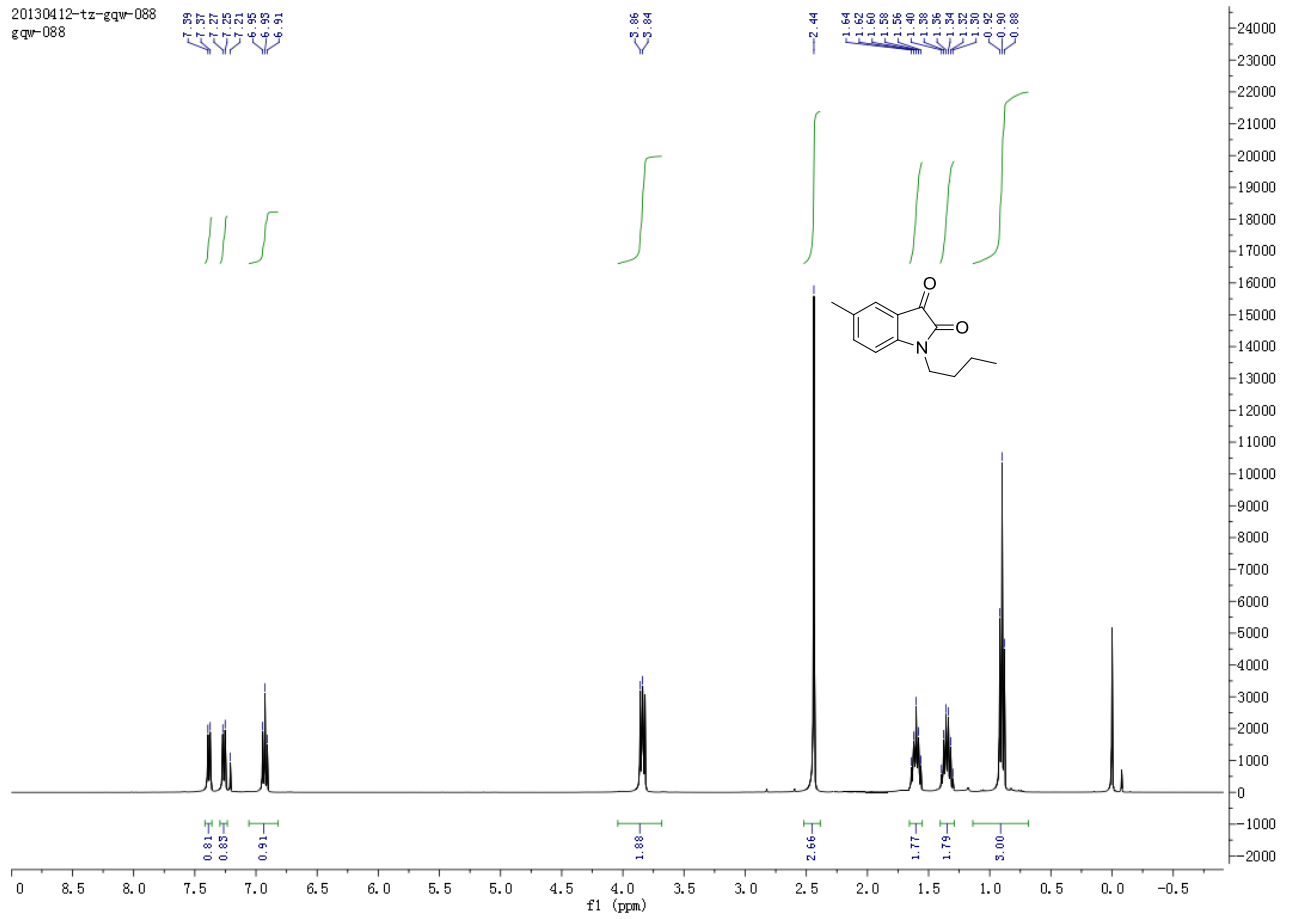

20130412-tz-gqr-088  
gqr-088

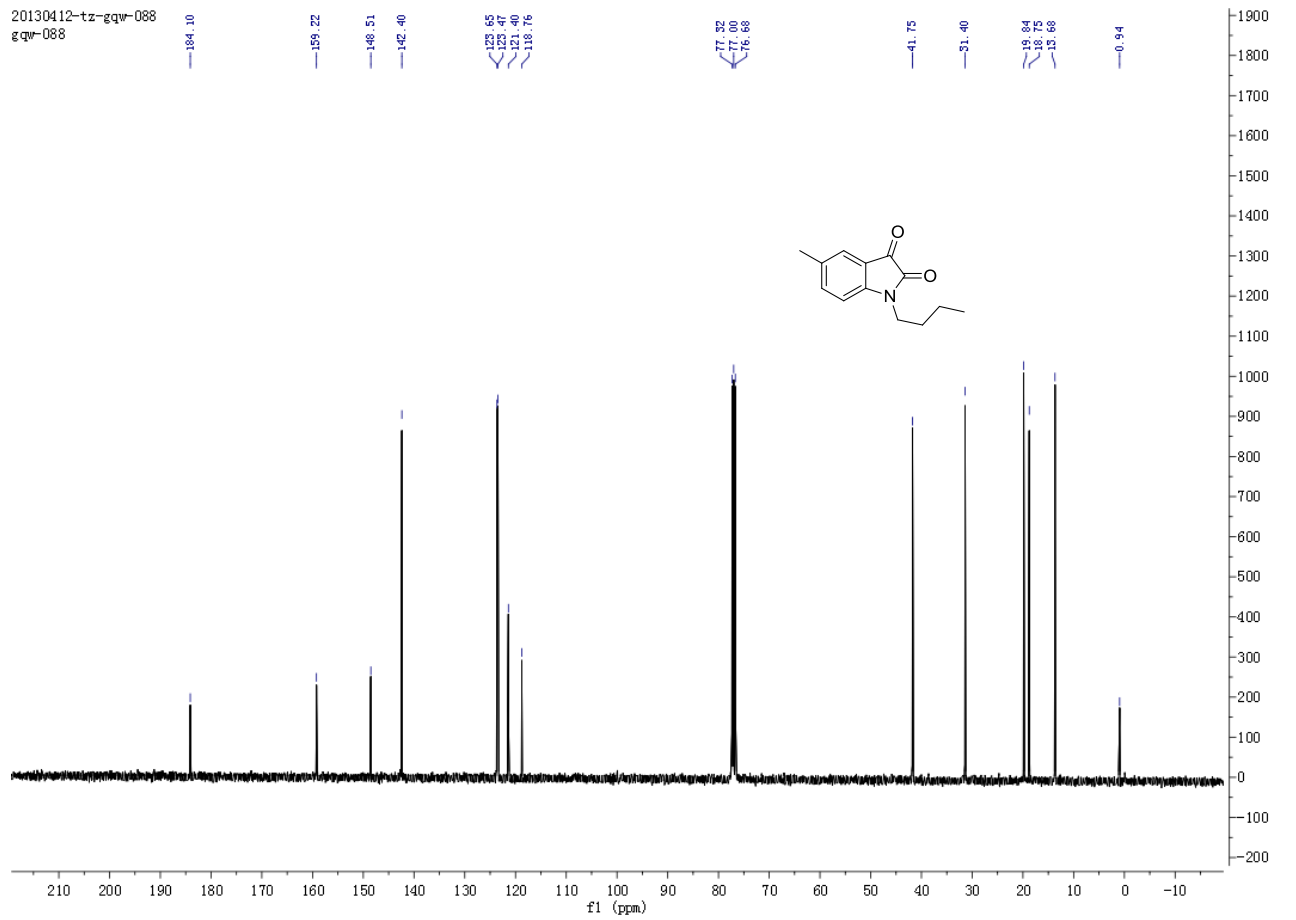



20130412-tz-gqr-090  
gqr-090

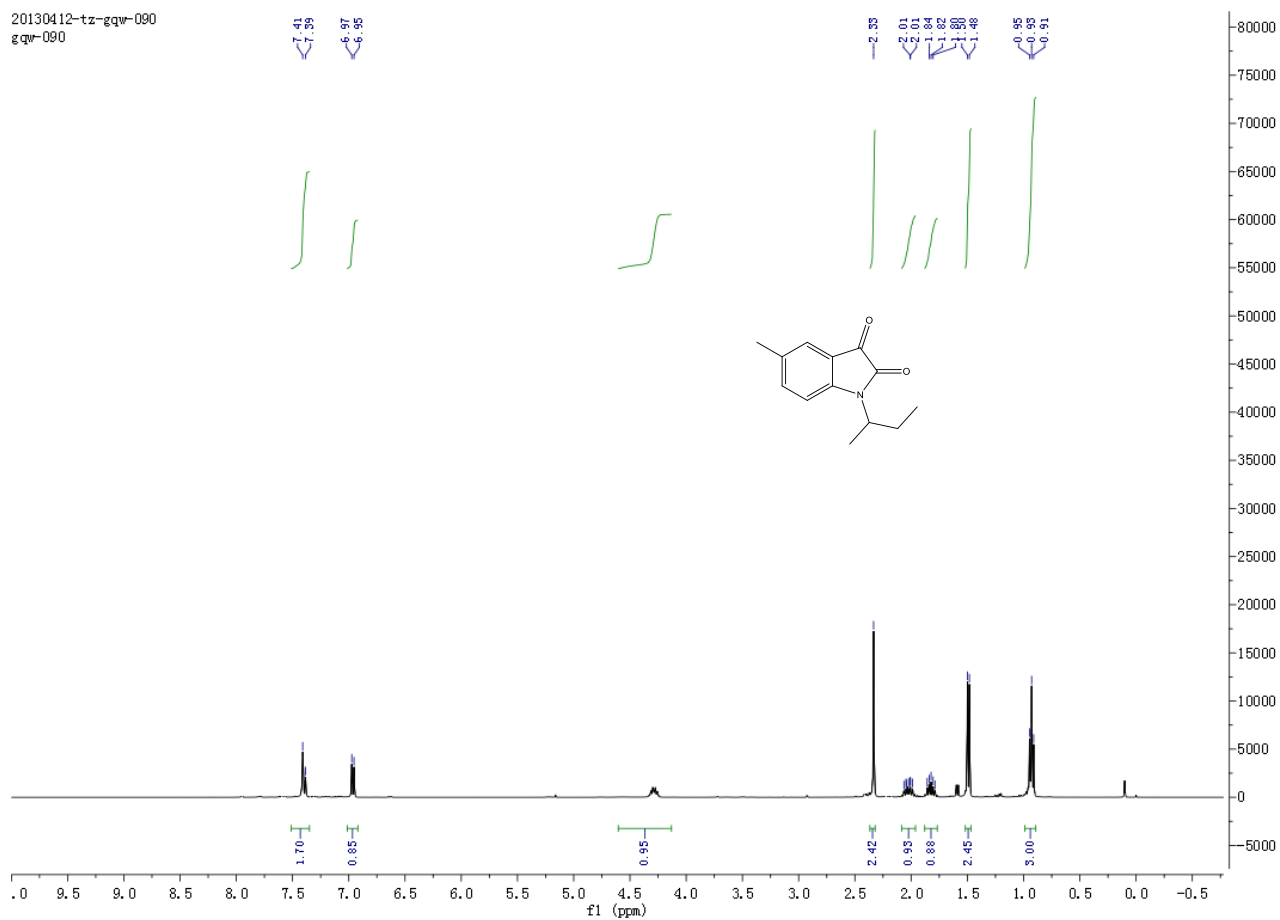

20130412-tz-gqr-090  
gqr-090

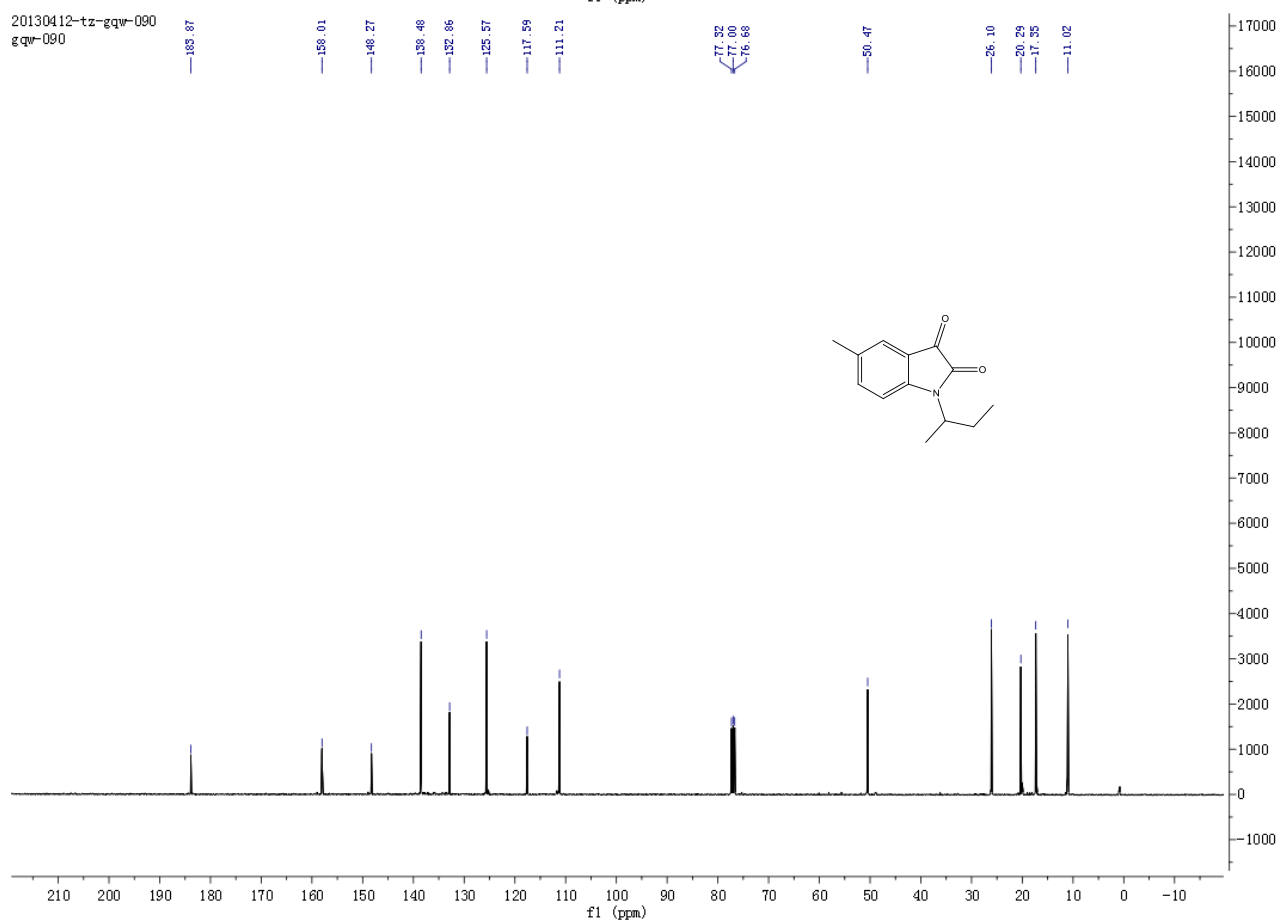

20130318-tz-gqr-64  
gqr-64

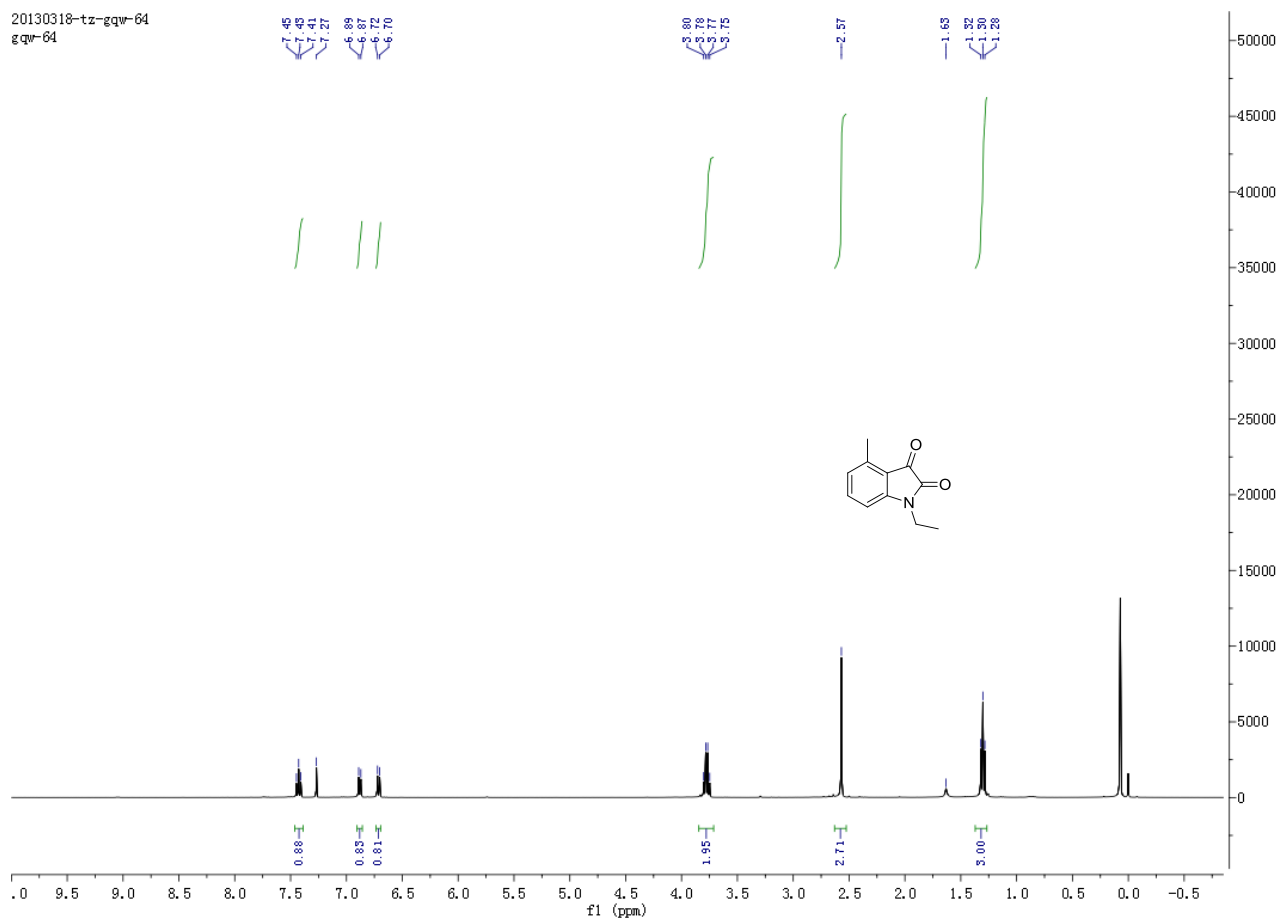

20130318-tz-gqr-64  
gqr-64

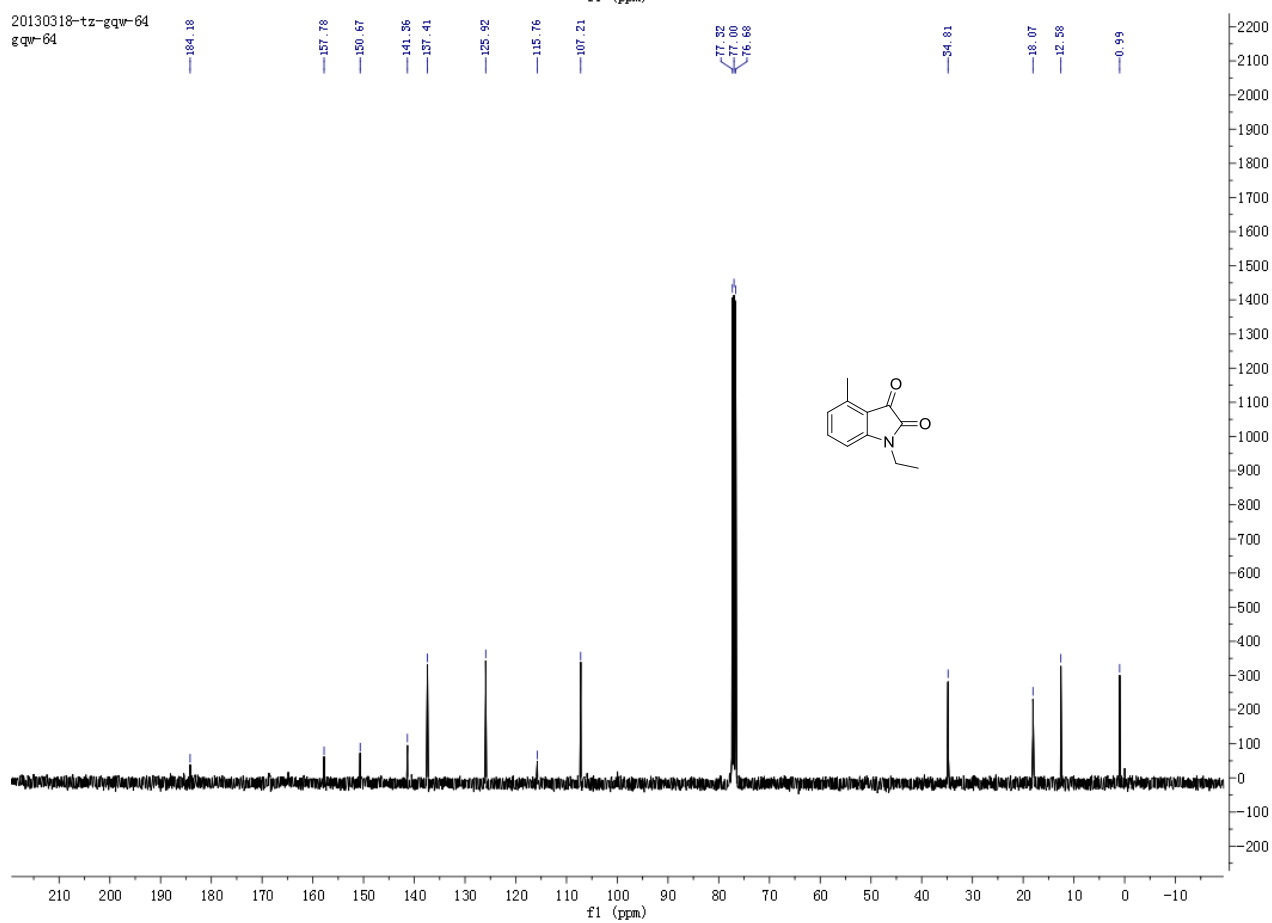

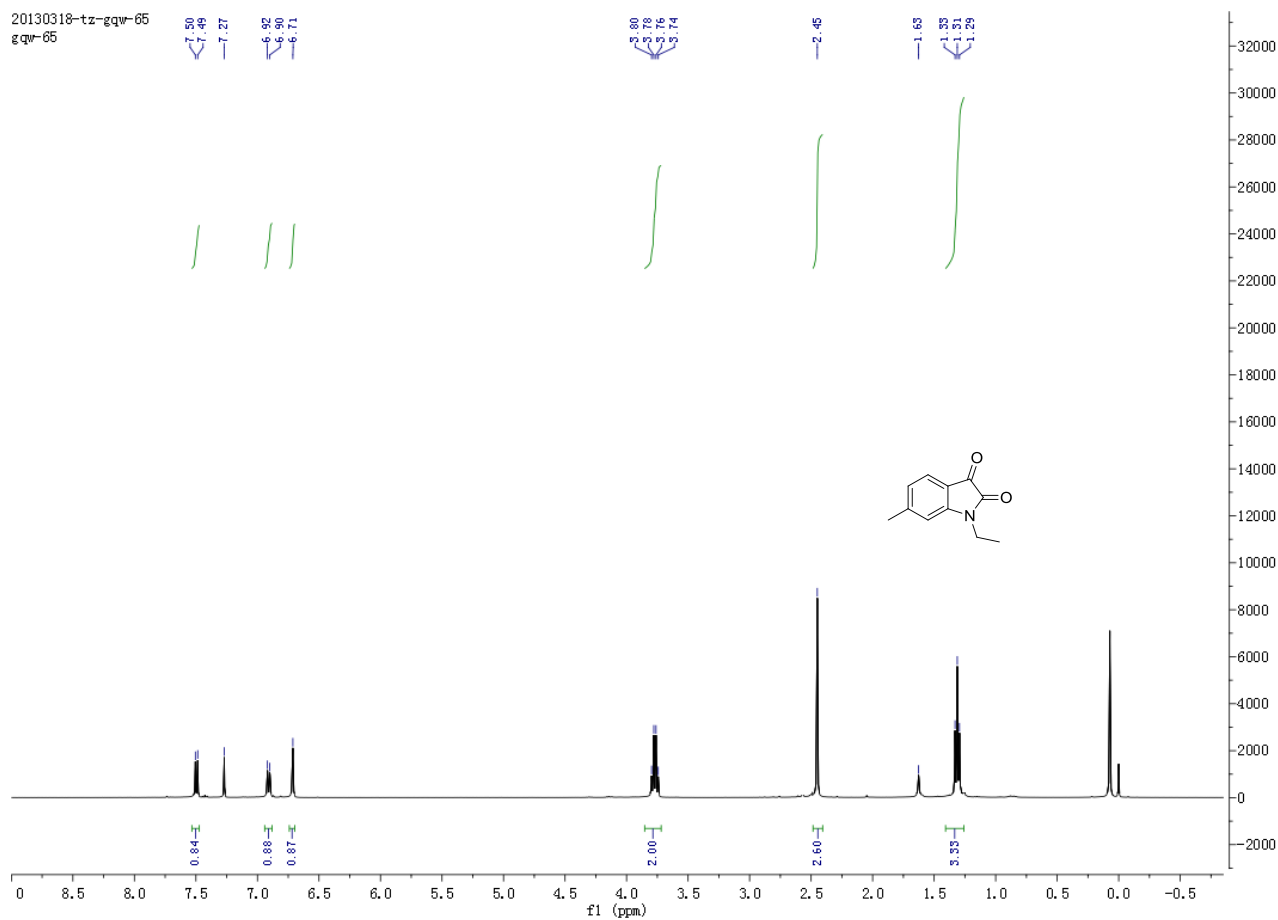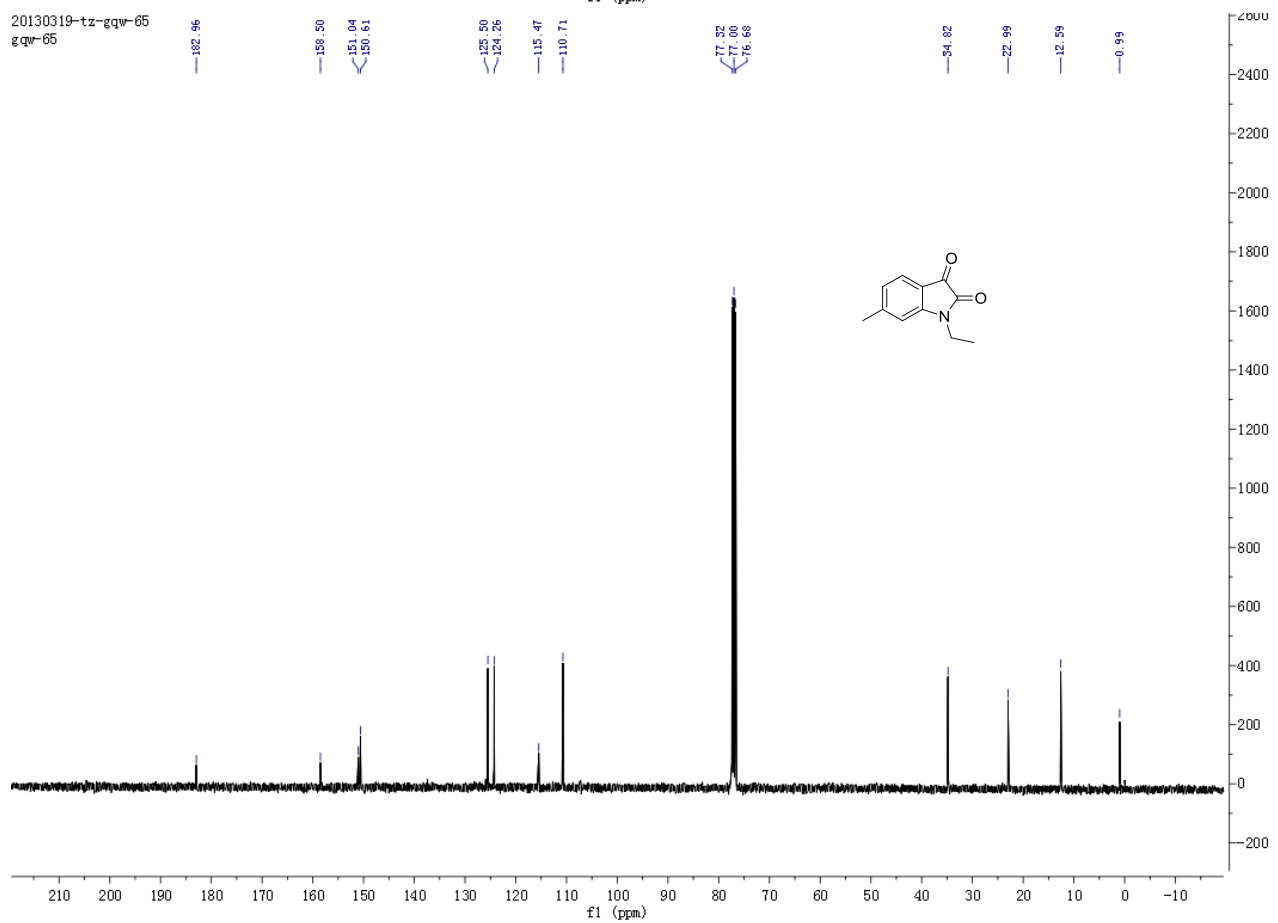

20130419-tz-gqw-95  
gqw-95

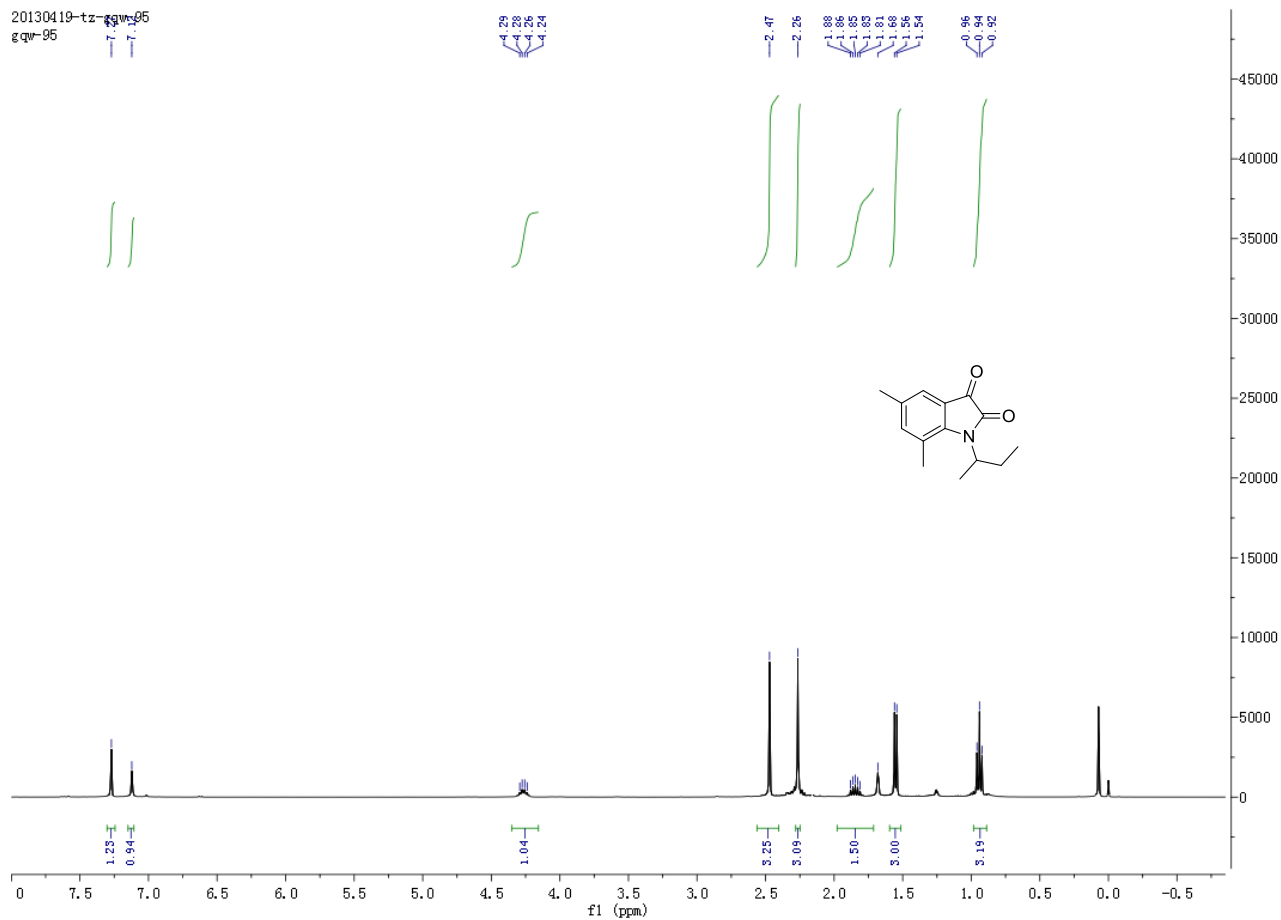

20130419-tz-gqw-95  
gqw-95

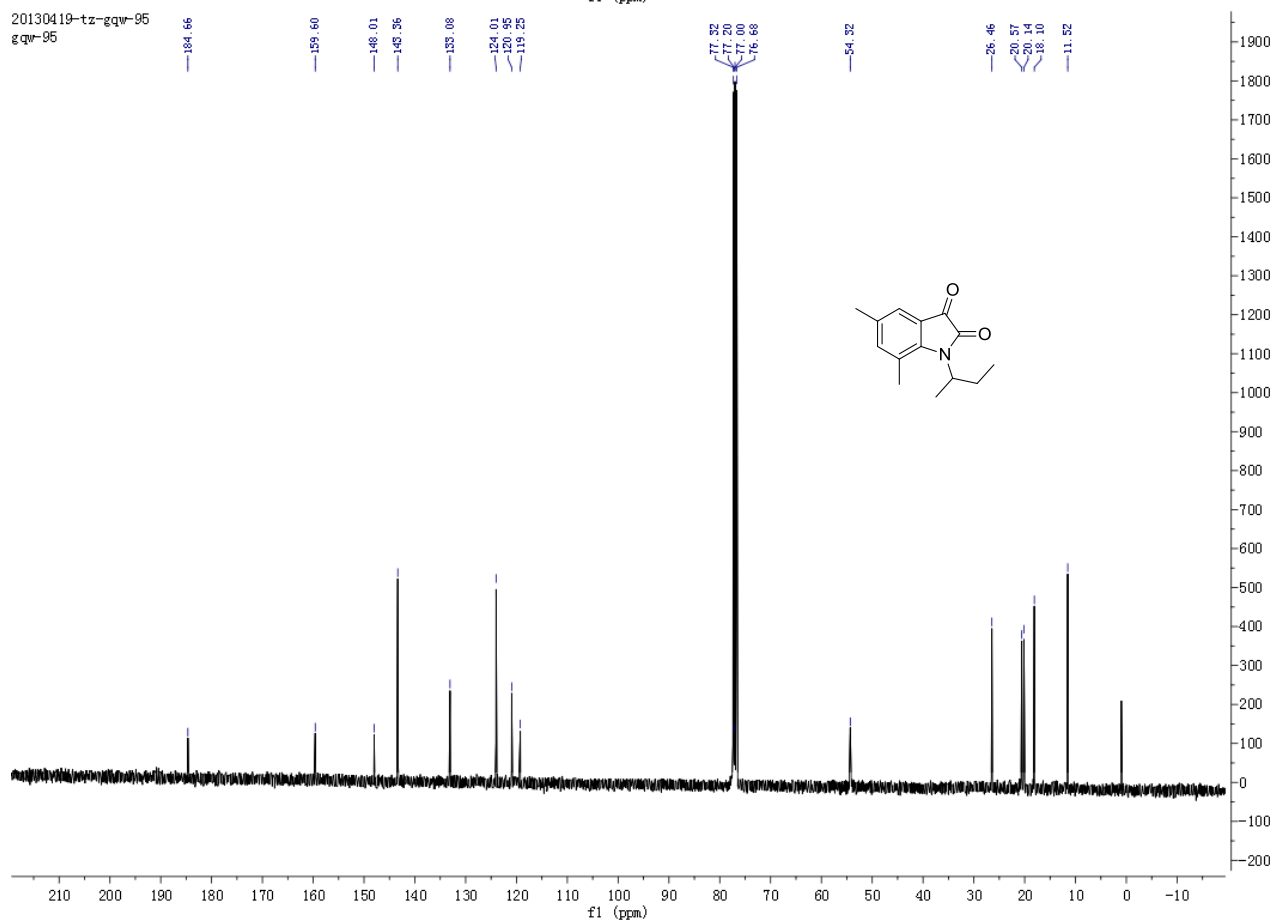

Supplement: c4ob00118d1.pdf [file c4ob00118d1.pdf]
